# Supplementary material for: Genome-scale CRISPR screen reveals neddylation to contribute to cisplatin resistance of testicular germ cell tumours
Source: PubMed Central journal article supplement (PMC10241889; doi:10.1038/s41416-023-02247-5), 2023-04-06
Supplement: 41416_2023_2247_MOESM1_ESM.pdf [file 41416_2023_2247_MOESM1_ESM.pdf]

# Genome-scale CRISPR screen reveals neddylation to contribute to cisplatin resistance of testicular germ cell tumors

## -Supplementary Figures-

Kai Funke<sup>1</sup>, Ulf Einsfelder<sup>2</sup>, Aylin Hansen<sup>1</sup>, Lena Arévalo<sup>1</sup>, Simon  
Schneider<sup>1</sup>, Daniel Nettersheim<sup>3</sup>, Valentin Stein<sup>2</sup> and Hubert  
Schorle<sup>1</sup>

*<sup>1</sup>Department of Developmental Pathology, Institute of Pathology, University Hospital Bonn,  
Bonn, Germany.*

*<sup>2</sup>Institute of Physiology II, University Hospital Bonn, Bonn, Germany*

*<sup>3</sup>Department of Urology, Urological Research Laboratory, Translational UroOncology,  
Medical Faculty and University Hospital Düsseldorf, Heinrich Heine University Düsseldorf,  
Düsseldorf, Germany*

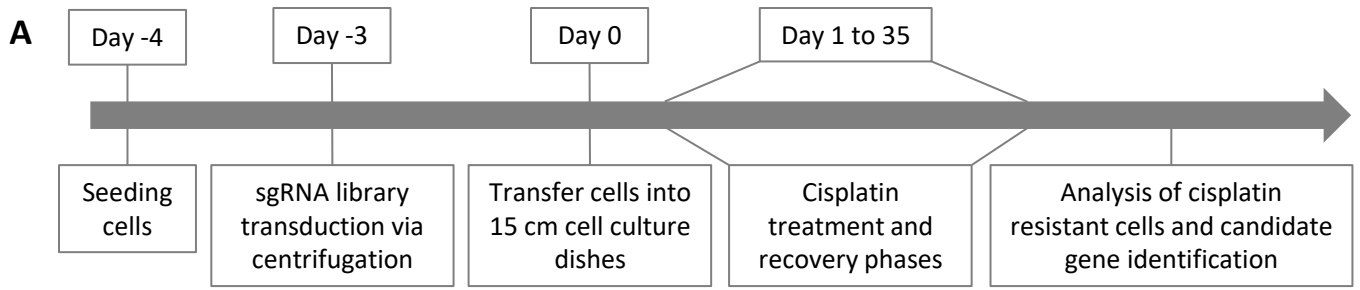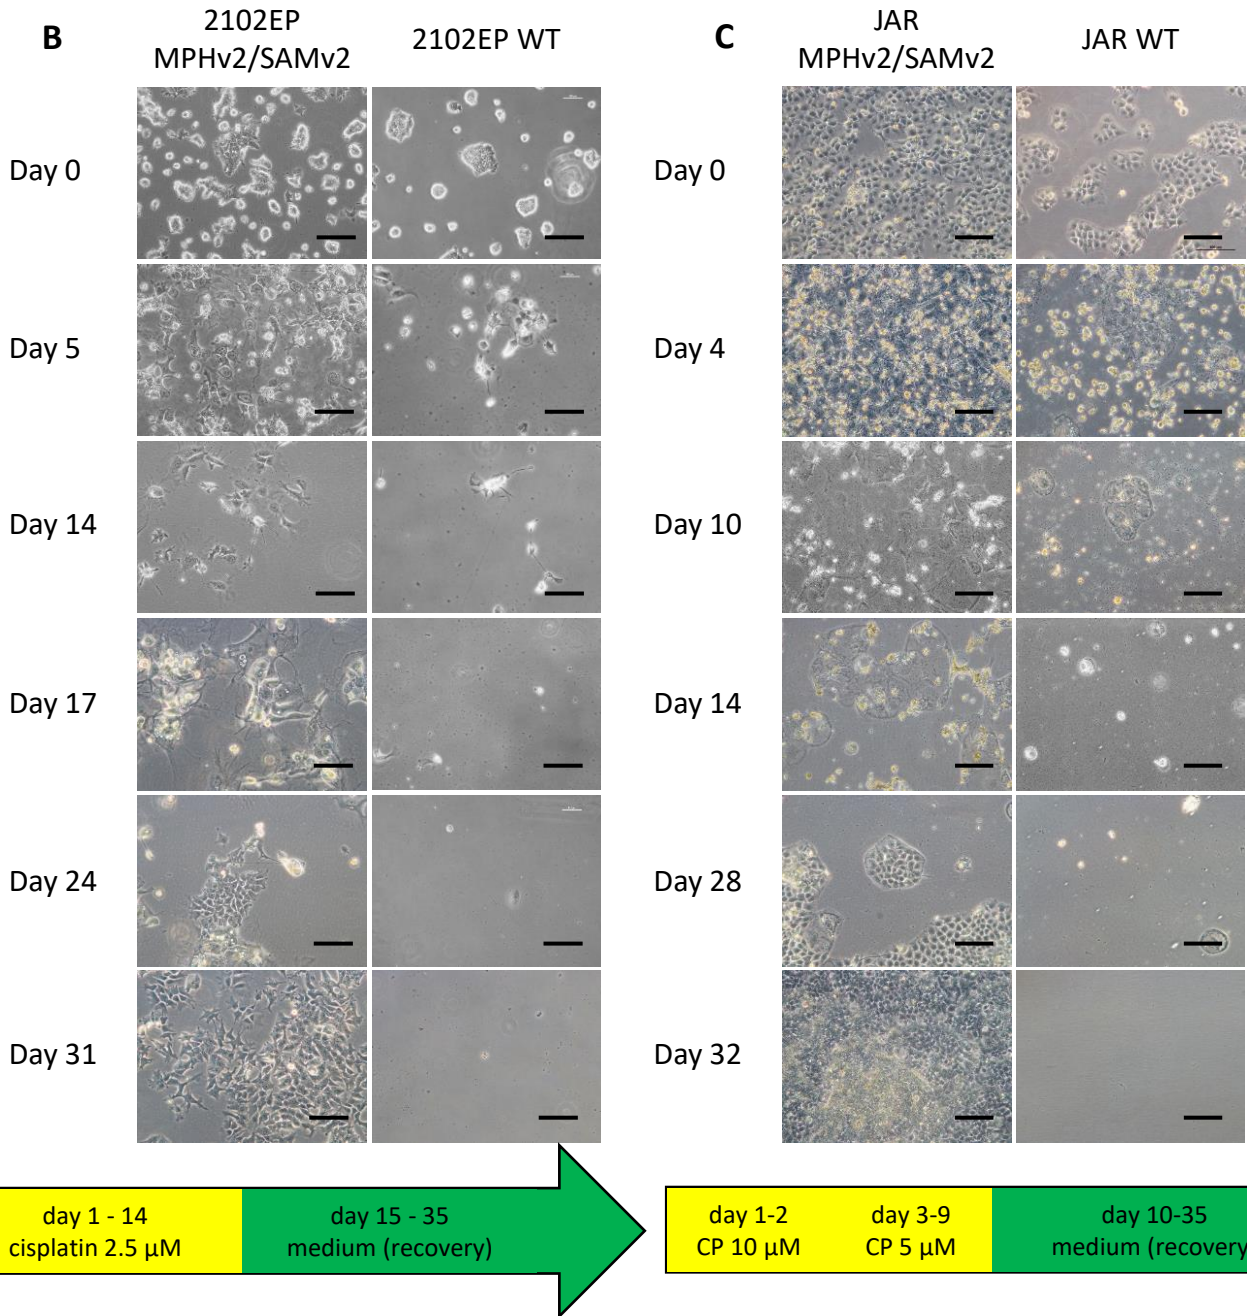

**Supplementary Figure S1: Genome-scale CRISPR screen – cisplatin treatment and recovery.** (A) Time line of genome-scale activation screen. After library transduction (B) 2102EP<sup>MPHv2/SAMv2</sup>, (C) JAR<sup>MPHv2/SAMv2</sup> cells as well as corresponding wild type control were treated with different cisplatin regimens. Brightfield images highlight the effect of cisplatin and the difference between library transduced cells and wild type cells (scale bar: 100  $\mu$ m). For 2102EP<sup>MPHv2/SAMv2</sup> and JAR<sup>MPHv2/SAMv2</sup> a sgRNA coverage of 99 to 100% was reached.

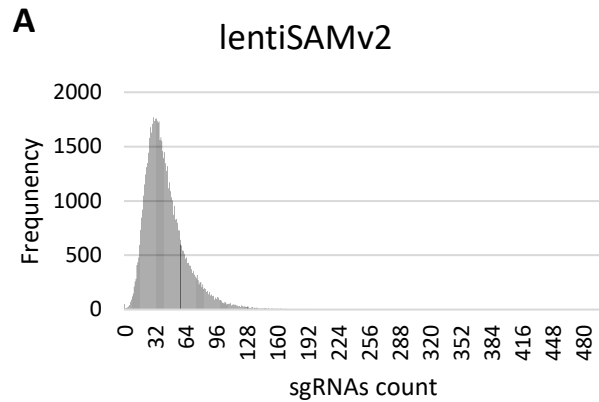

**B**

|                                     | <b>lentiSAMv2</b> |
|-------------------------------------|-------------------|
| Detected sgRNAs [count]             | 70248             |
| Detected sgRNAs [%]                 | 99.93             |
| Undetected sgRNAs [count]           | 49                |
| Undetected sgRNAs [%]               | 0.07              |
| Skew ratio of top 10% to bottom 10% | 3.4               |
| Guides total                        | 70297             |
| Reads total                         | 3079894           |

**Supplementary Figure S2:** Genome-scale plasmid library – quality check. After library amplification and preparation next generation sequencing was performed to investigate library quality and sgRNA coverage. (A) Normal distribution of sgRNA frequencies and counts for lentiSAMv2 plasmid library. (B) Computational analysis was performed according to Joung *et al.* 2017.

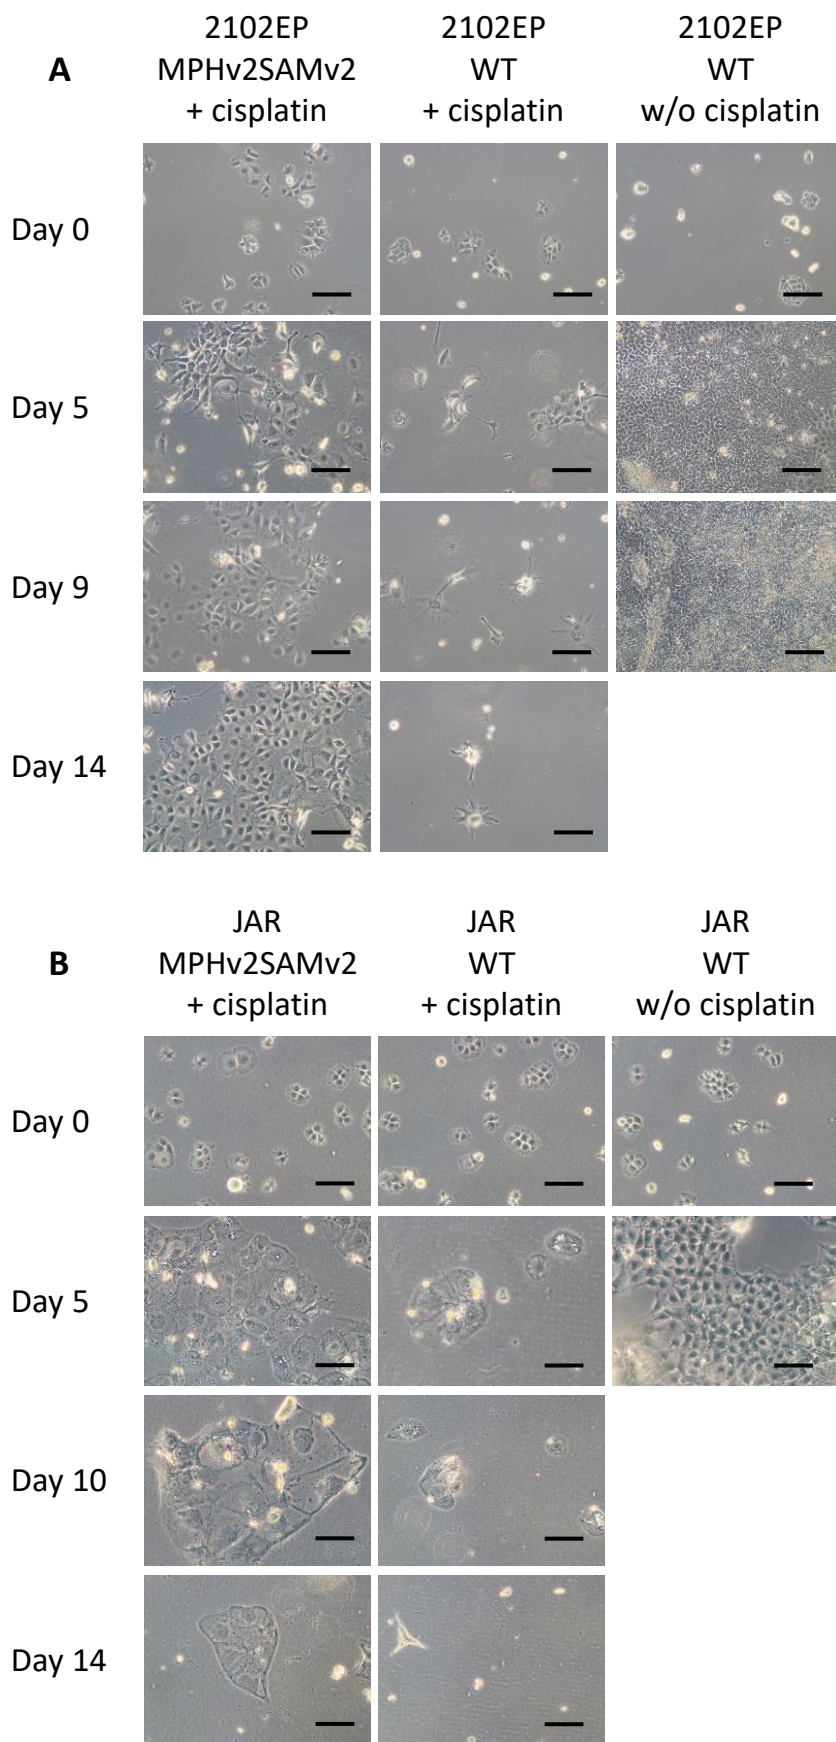

**Supplementary Figure S3:** Validation of cisplatin resistance by re-treatment. Surviving cells after initial genome-scale CRISPR/Cas9 based activation (SAMv2) screen were seeded again ( $2.5 \times 10^4$  cells per well of a 6 well cell culture plate) and re-treated with cisplatin. (A) 2102EP<sup>MPHv2/SAMv2</sup>, and 2102EP<sup>WT</sup> cells (control) were seeded and treated with 2.5  $\mu$ M cisplatin for 14 days. One additional wild type sample was kept in medium without cisplatin. (B) JAR<sup>MPHv2/SAMv2</sup> and JAR<sup>WT</sup> cells (control) were seeded and treated with 5  $\mu$ M cisplatin for 14 days. An additional wild type sample was cultured in medium without cisplatin. Scale bar: 100  $\mu$ m.

## Activation Screen (MPHv2SAMv2) – Candidate Genes

| 2102 EP |           |             | JAR  |           |             |      |           |             |
|---------|-----------|-------------|------|-----------|-------------|------|-----------|-------------|
| Rank    | Gene name | read counts | Rank | Gene name | read counts | Rank | Gene name | read counts |
| 1       | TRAP1     | 8044032     | 1    | CYP2R1    | 4248699     | 36   | TRAP1     | 36686       |
| 2       | TK1       | 7803883     | 2    | LEKR1     | 4084952     | 37   | OR8B3     | 36487       |
| 3       | DDB1      | 6841409     | 3    | CCL1      | 2230750     | 38   | TK1       | 34429       |
| 4       | ENSA      | 1590607     | 4    | LHB       | 1223512     | 39   | ARAF      | 30934       |
| 5       | IFNW1     | 656648      | 5    | WBP2NL    | 1066313     | 40   | NAT14     | 30356       |
| 6       | AKT3      | 531280      | 6    | OR2W1     | 331952      | 41   | NT5C3A    | 29223       |
| 7       | PIR       | 499632      | 7    | PLEKHF1   | 307083      | 42   | KLK5      | 28747       |
| 8       | AK1       | 496415      | 8    | NAE1      | 179370      | 43   | ING1      | 28599       |
| 9       | KIF27     | 489821      | 9    | CLDND2    | 171947      | 44   | SGOL2     | 28571       |
| 10      | GMNC      | 483723      | 10   | ANGPTL1   | 167831      | 45   | APOM      | 27737       |
| 11      | CYP27A1   | 478347      | 11   | CELF1     | 164345      | 46   | DDB1      | 27734       |
| 12      | PERP      | 462899      | 12   | SOAT1     | 106411      | 47   | CDC37     | 26990       |
| 13      | MGAT4A    | 458608      | 13   | AGPAT2    | 105646      | 48   | SNRK      | 26934       |
| 14      | ZC3H14    | 420023      | 14   | EFR3B     | 95494       | 49   | PAPD5     | 24778       |
| 15      | CLEC2D    | 413240      | 15   | TLCD1     | 94701       | 50   | FBXO18    | 24447       |
| 16      | DPP10     | 374926      | 16   | KCNJ12    | 92110       | 51   | NUP133    | 23166       |
| 17      | C17orf103 | 359665      | 17   | ALDH3B1   | 89330       | 52   | ZNF676    | 20759       |
| 18      | DDX10     | 295925      | 18   | MDN1      | 87298       | 53   | RHOBTB1   | 20123       |
| 19      | KLHL36    | 230245      | 19   | ALKBH3    | 81611       | 54   | LOC441155 | 19573       |
| 20      | SPDYC     | 224181      | 20   | RNF165    | 76285       | 55   | UNC79     | 19160       |
| 21      | PP2D1     | 204439      | 21   | CRY2      | 73850       | 56   | SVOPL     | 18118       |
| 22      | MTRNR2L6  | 186447      | 22   | IRF2BP2   | 56826       | 57   | OR6C1     | 17054       |
| 23      | MTMR11    | 172159      | 23   | CASC10    | 53587       | 58   | LRRC43    | 16162       |
| 24      | DNAJB6    | 149516      | 24   | NPIPA7    | 53418       | 59   | GPD2      | 13226       |
| 25      | GCC1      | 125790      | 25   | LEPROTL1  | 53049       | 60   | EEF2K     | 13037       |
| 26      | FAM115A   | 124352      | 26   | CALCOCO2  | 50726       | 61   | TGIF1     | 12622       |
|         |           |             | 27   | SCAND1    | 49872       | 62   | BMF       | 12391       |
|         |           |             | 28   | RUNX1     | 48367       | 63   | IGSF10    | 12082       |
|         |           |             | 29   | FADS1     | 45803       | 64   | PHGR1     | 12035       |
|         |           |             | 30   | POLE4     | 43866       | 65   | DHRS12    | 11884       |
|         |           |             | 31   | CPT1C     | 42620       | 66   | C1orf189  | 11776       |
|         |           |             | 32   | ITSN1     | 42605       | 67   | CEP350    | 11669       |
|         |           |             | 33   | ANK1      | 40835       | 68   | LDLRAD4   | 11262       |
|         |           |             | 34   | HTR3E     | 40078       | 69   | HESX1     | 11134       |
|         |           |             | 35   | KRT71     | 36909       | 70   | USP6NL    | 10717       |

**Supplementary Figure S4:** Full list of candidate genes based on the genome-scale CRISPR/Cas9 activation screen (MPHv2/SAMv2). Candidate genes with a threshold of read count higher than 10000 are shown for 2102EP and JAR cells. Bioinformatic analysis of the NGS results was performed using Biopython.

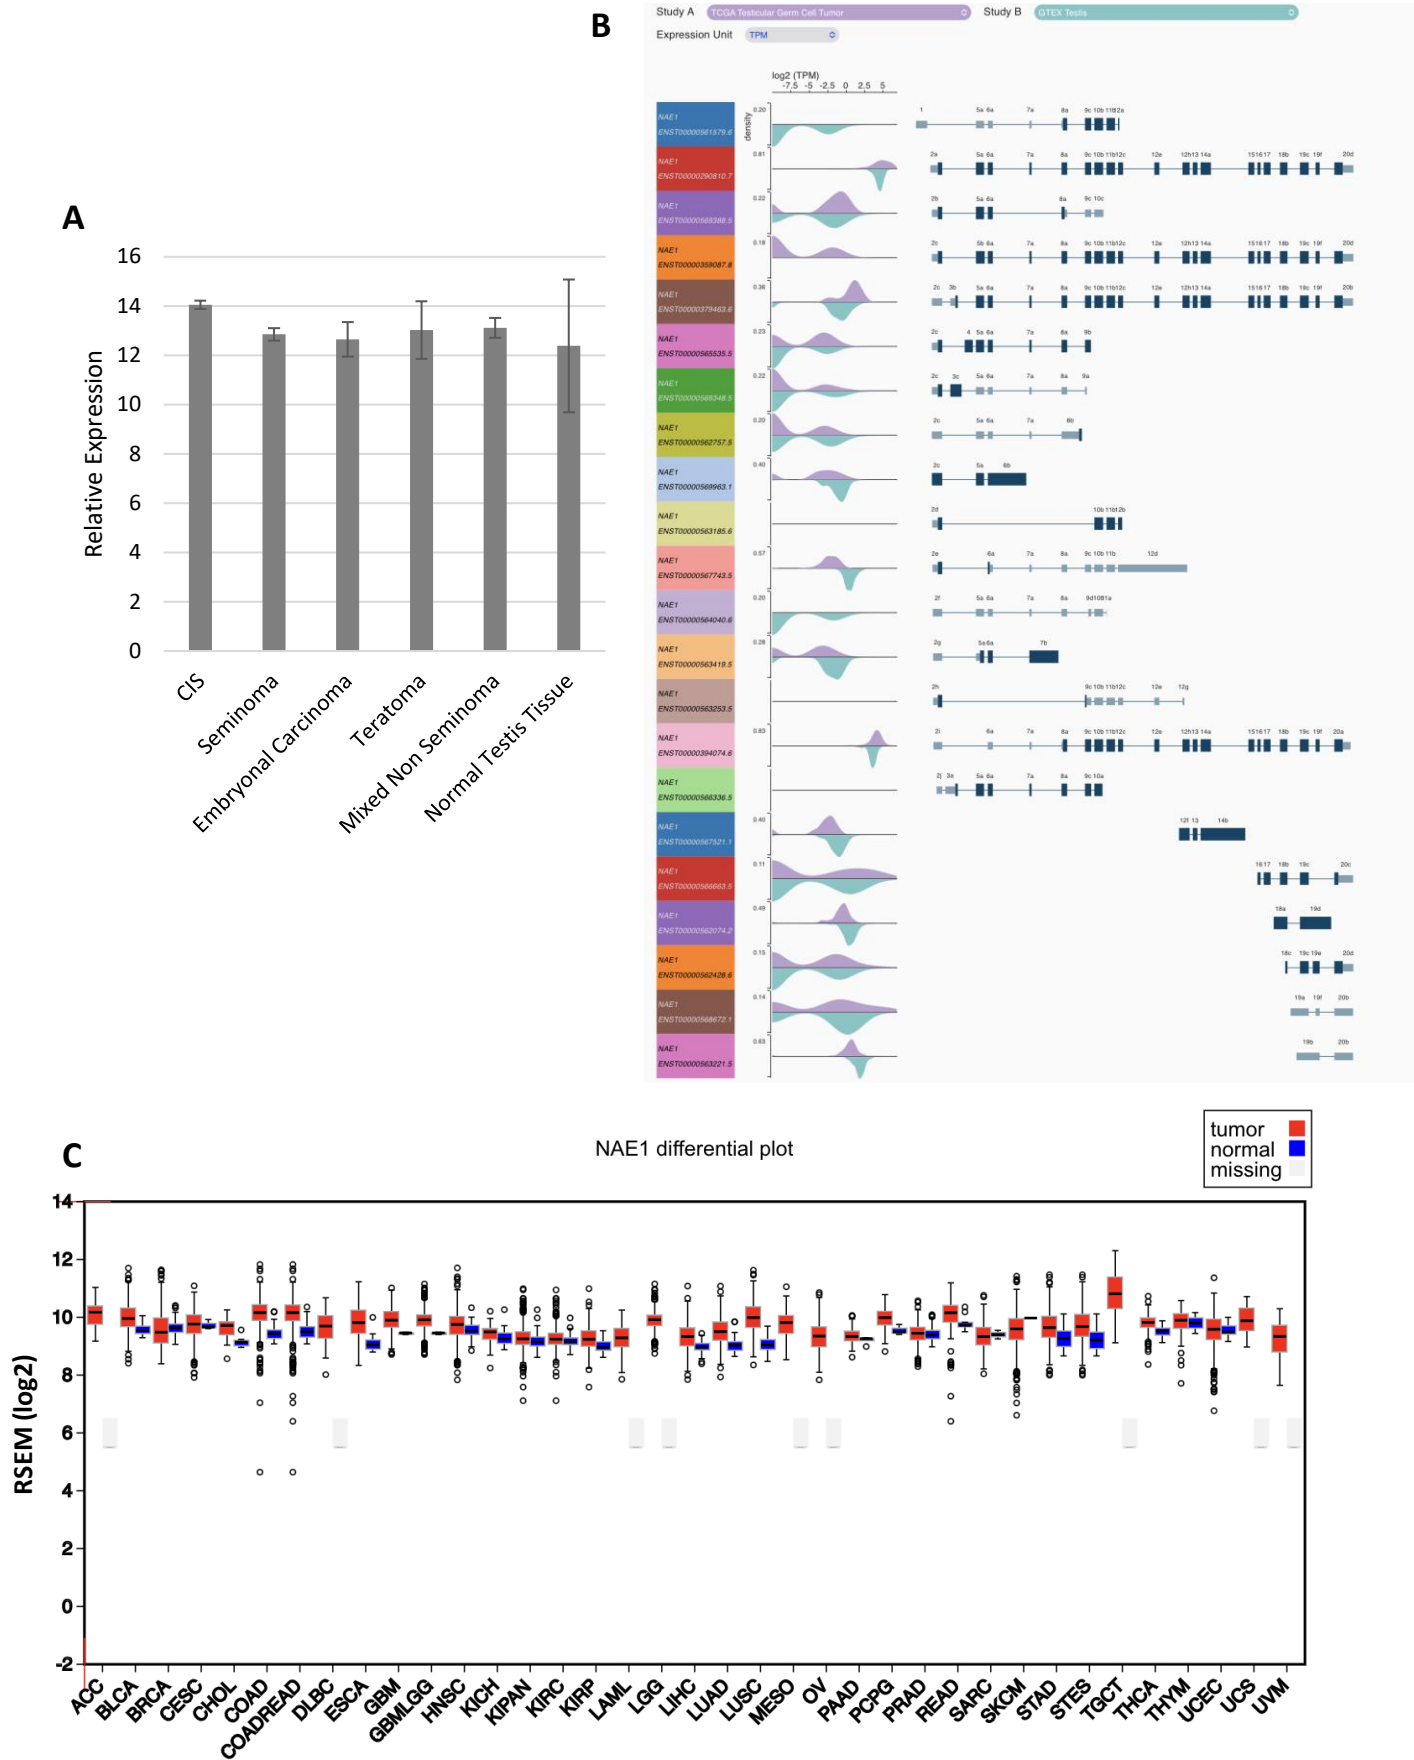

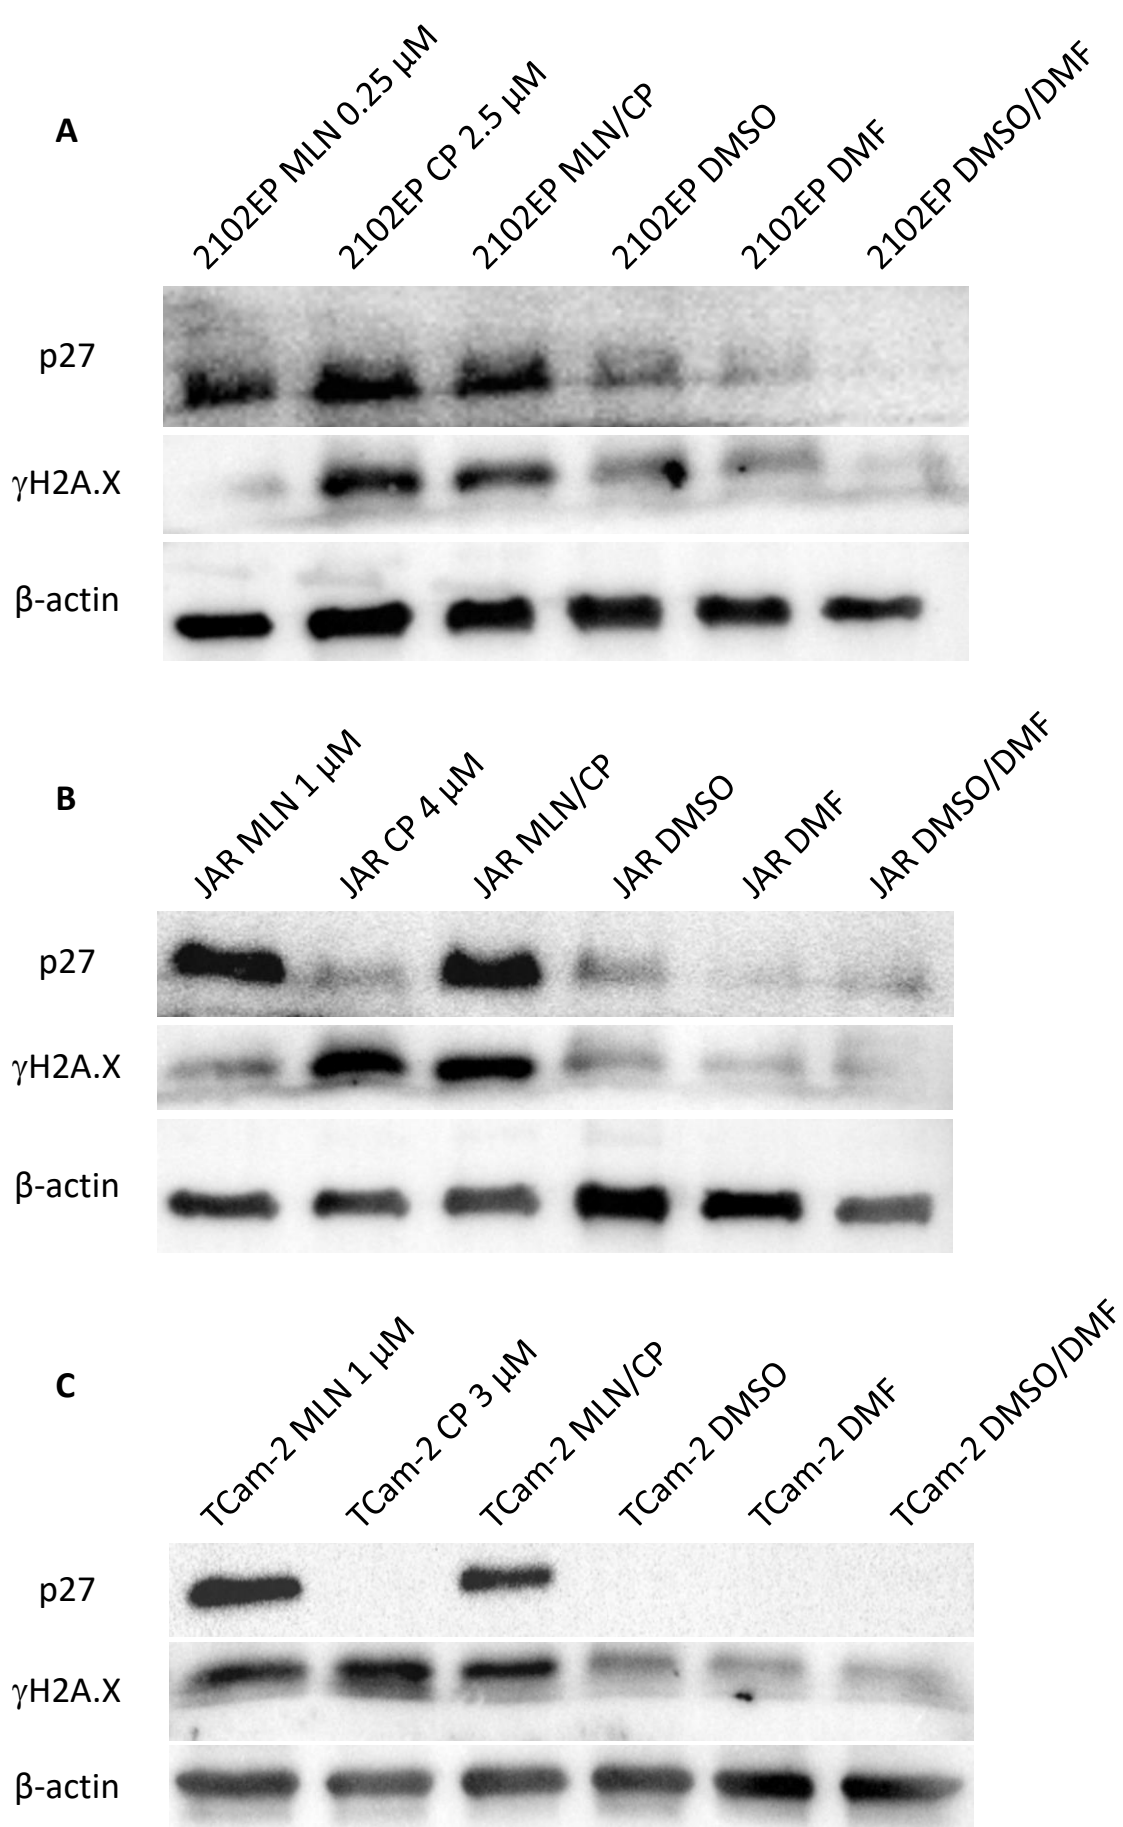

**Supplementary Figure S6:** Mode of action of MLN4924 (MLN) and cisplatin (CP). (A) 2102EP, (B) JAR and (C) TCam-2 cells were seeded in 6 well cell culture plates ( $1.5 \times 10^5$  cells/well) and treated for 2 days with MLN4924, cisplatin, combination of both drugs using indicated concentrations or corresponding solvent control (DMSO, DMF, DMSO/DMF). Subsequently, proteins were isolated and analyzed via SDS-PAGE and Western Blot using p27,  $\gamma$ H2A.X and  $\beta$ -actin antibodies.

A

2102EP MLN4924

GO:0006915 Apoptotic process

GO:0008219 Cell death

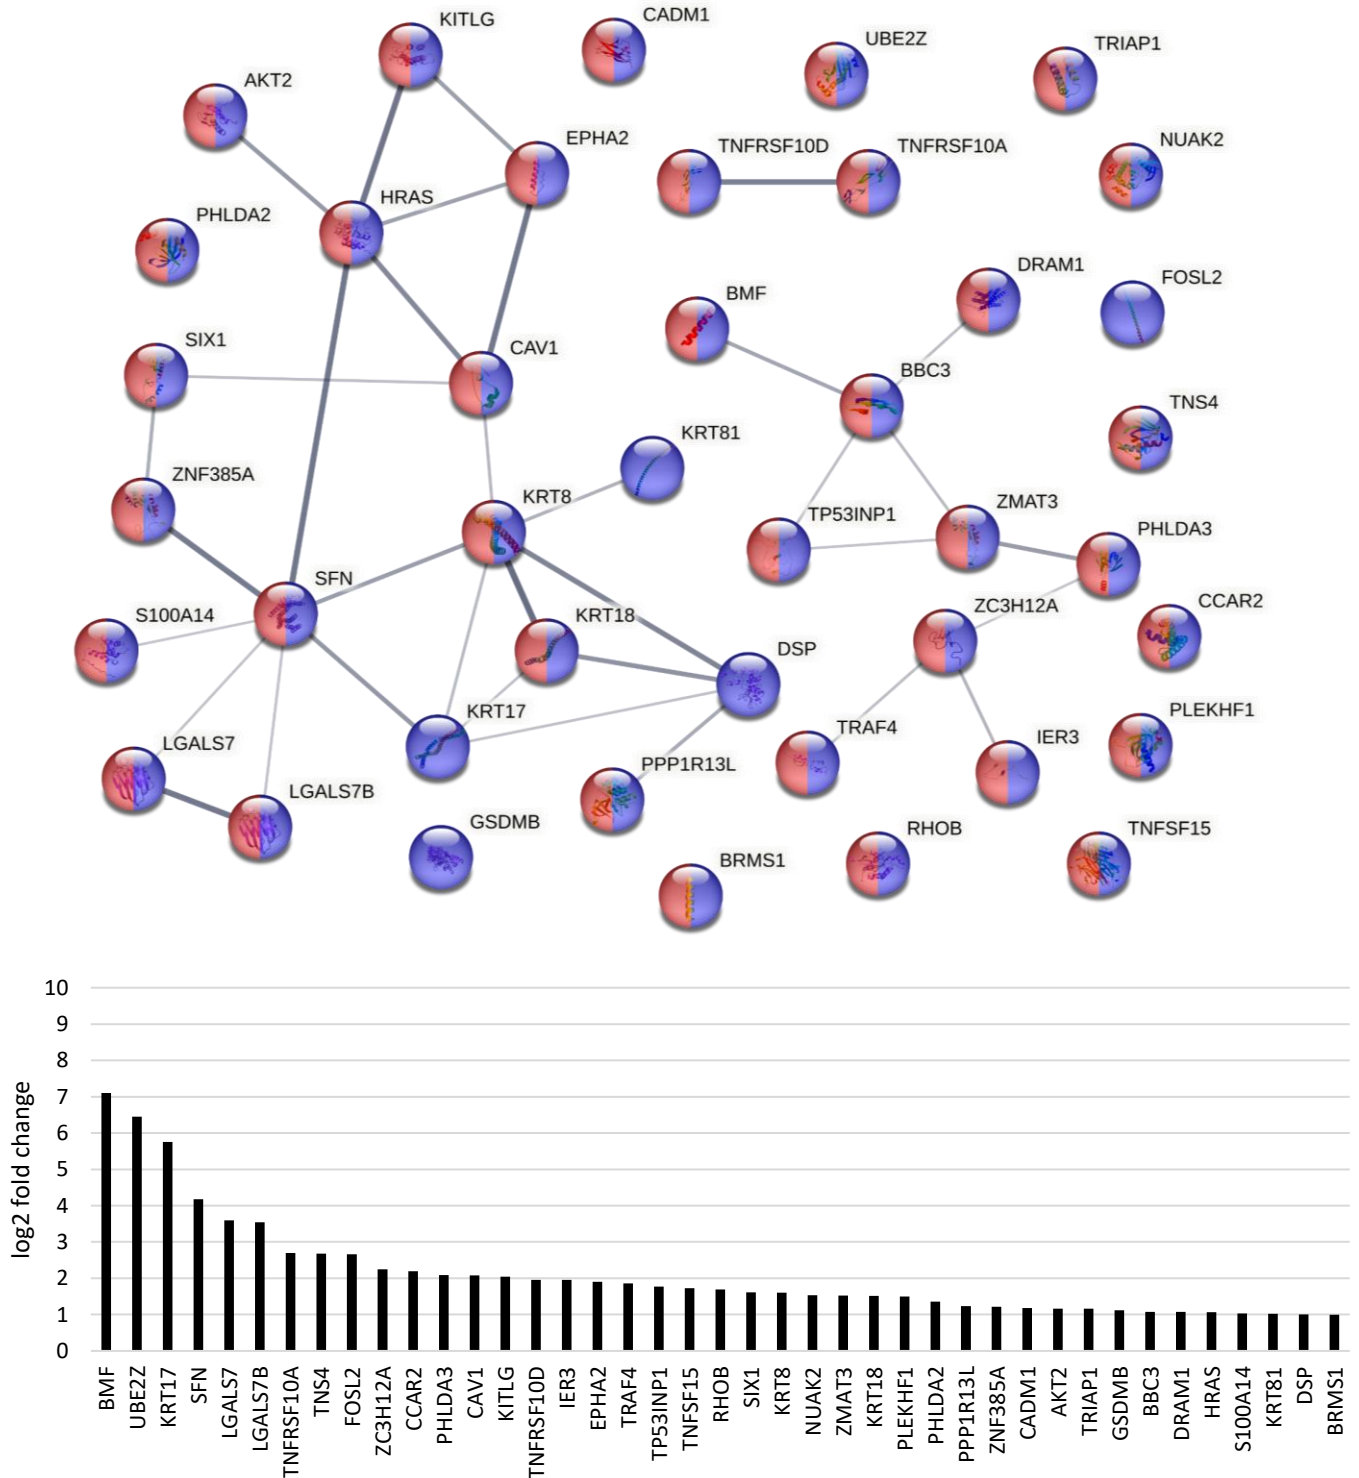

**Supplementary Figure S7:** Complete STRING network of connected and non-connected differentially upregulated genes associated with GO terms apoptosis and cell death. Additionally, log<sub>2</sub> fold changes are depicted. Transcriptome analysis of 2102EP cells after 2 days of (A) MLN4924 (0.25  $\mu$ M), (B) cisplatin (2.5  $\mu$ M) or (C) MLN4924/cisplatin combination (0.25  $\mu$ M/2.5  $\mu$ M) treatment. Data represent independent biological replicate mean. For all samples  $n = 3$ .



B

## 2102EP cisplatin

GO:0006915 Apoptotic process

GO:0008219 Cell death

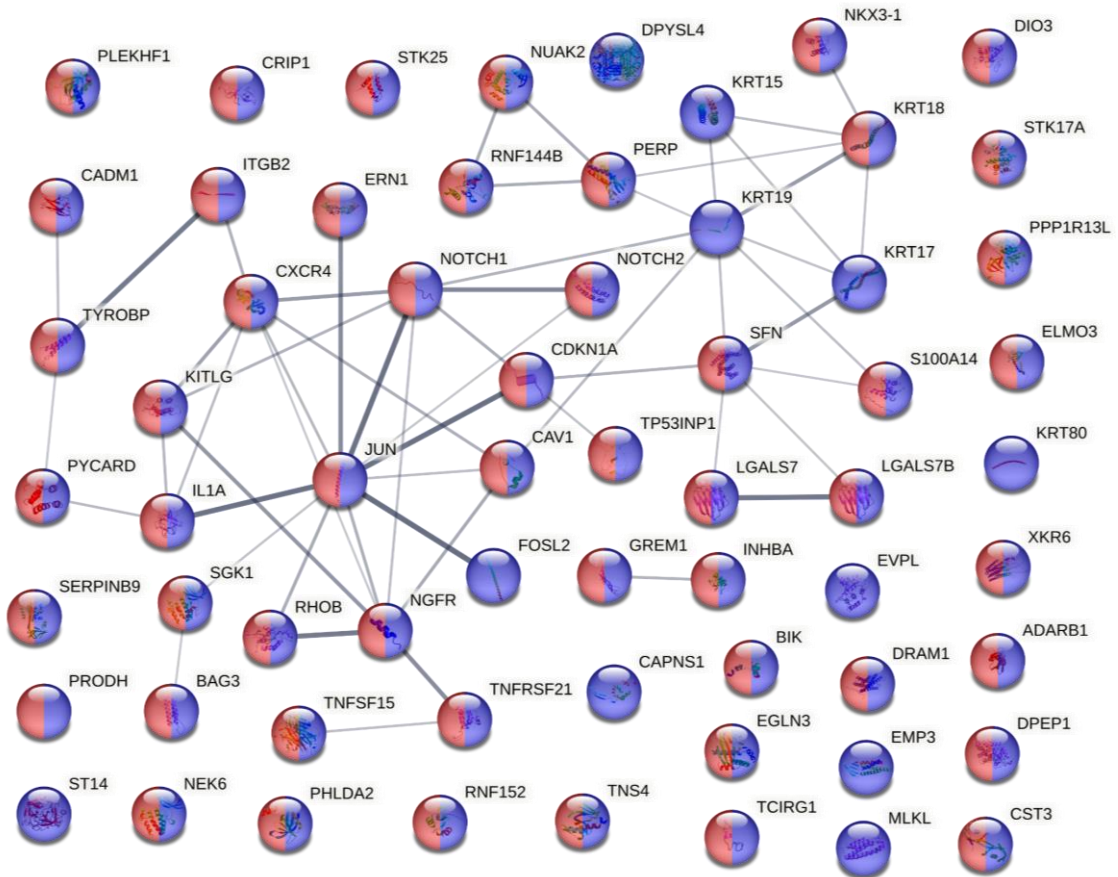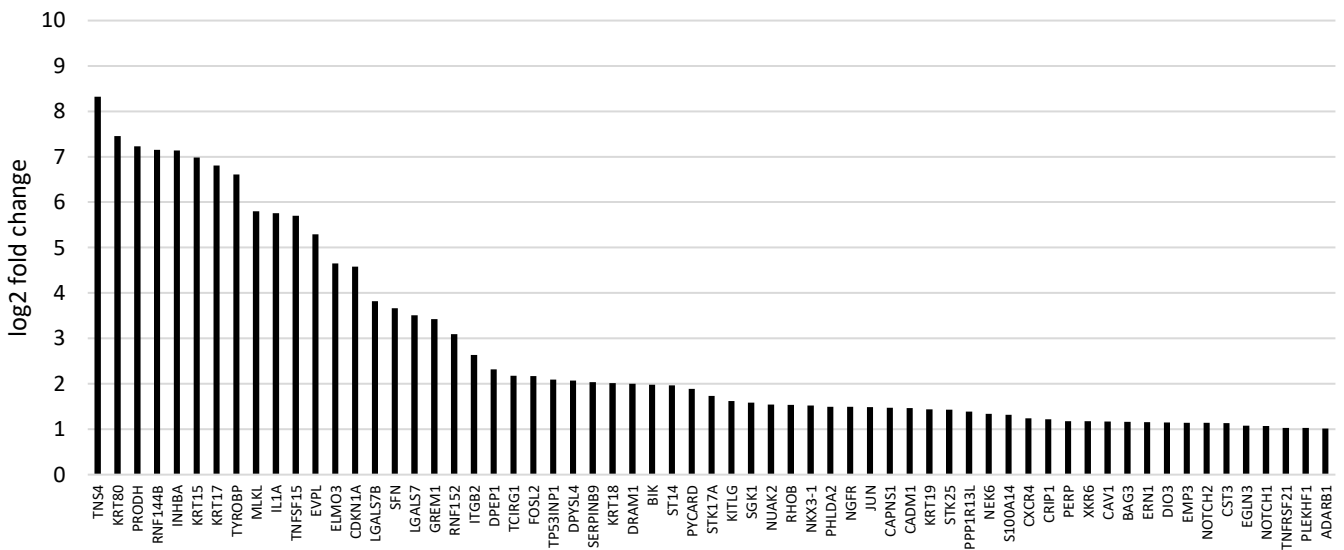

**Supplementary Figure S7:** Complete STRING network of connected and non-connected differentially upregulated genes associated with GO terms apoptosis and cell death. Additionally, log<sub>2</sub> fold changes are depicted. Transcriptome analysis of 2102EP cells after 2 days of (A) MLN4924 (0.25  $\mu$ M), (B) cisplatin (2.5  $\mu$ M) or (C) MLN4924/cisplatin combination (0.25  $\mu$ M/2.5  $\mu$ M) treatment. Data represent independent biological replicate mean. For all samples  $n = 3$ .

C

## 2102EP MLN4924/cisplatin

GO:0006915 Apoptotic process

GO:0008219 Cell death

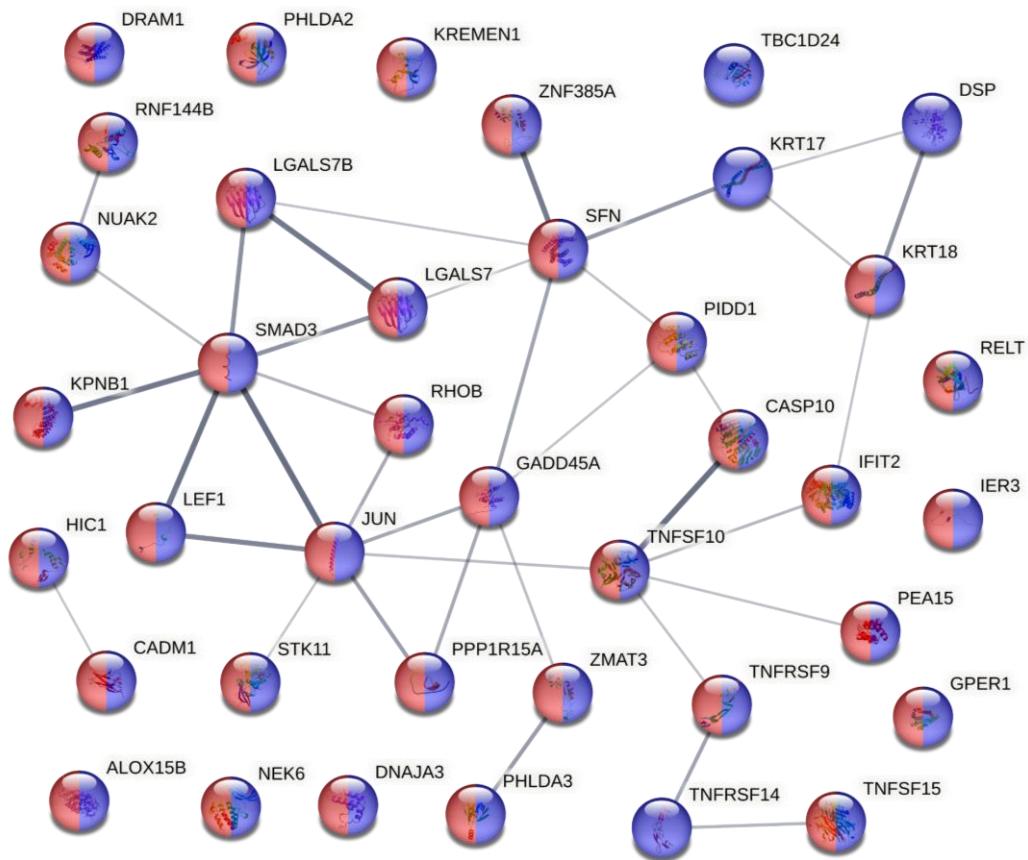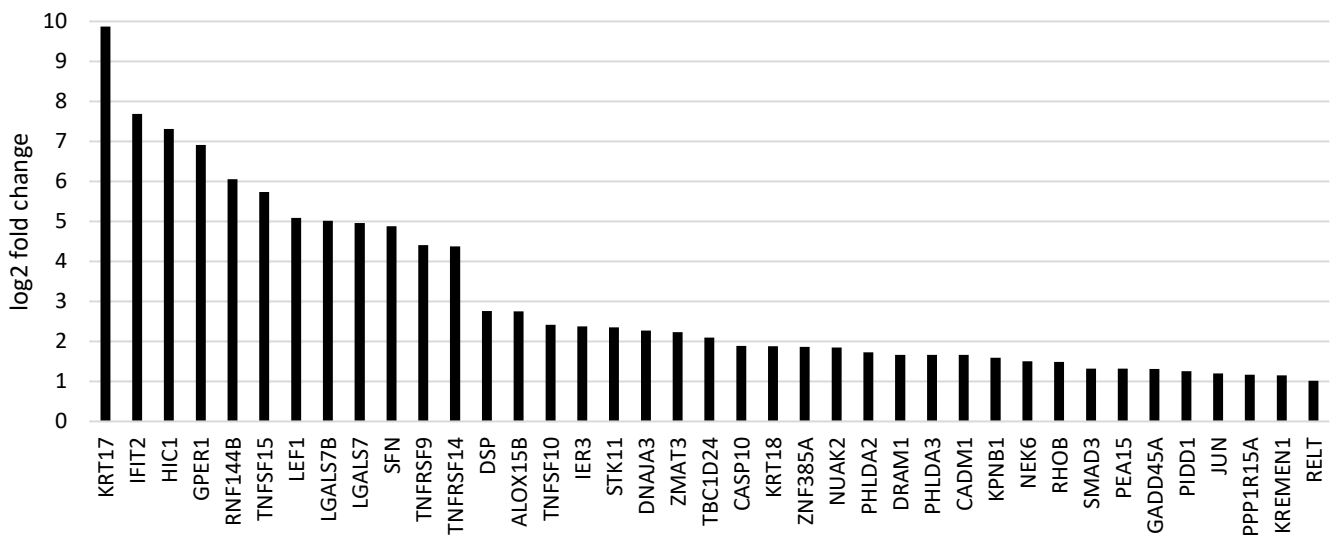

**Supplementary Figure S7:** Complete STRING network of connected and non-connected differentially upregulated genes associated with GO terms apoptosis and cell death. Additionally, log<sub>2</sub> fold changes are depicted. Transcriptome analysis of 2102EP cells after 2 days of (A) MLN4924 (0.25  $\mu$ M), (B) cisplatin (2.5  $\mu$ M) or (C) MLN4924/cisplatin combination (0.25  $\mu$ M/2.5  $\mu$ M) treatment. Data represent independent biological replicate mean. For all samples  $n = 3$ .

D

## JAR MLN4924

GO:0006915 Apoptotic process

GO:0008219 Cell death

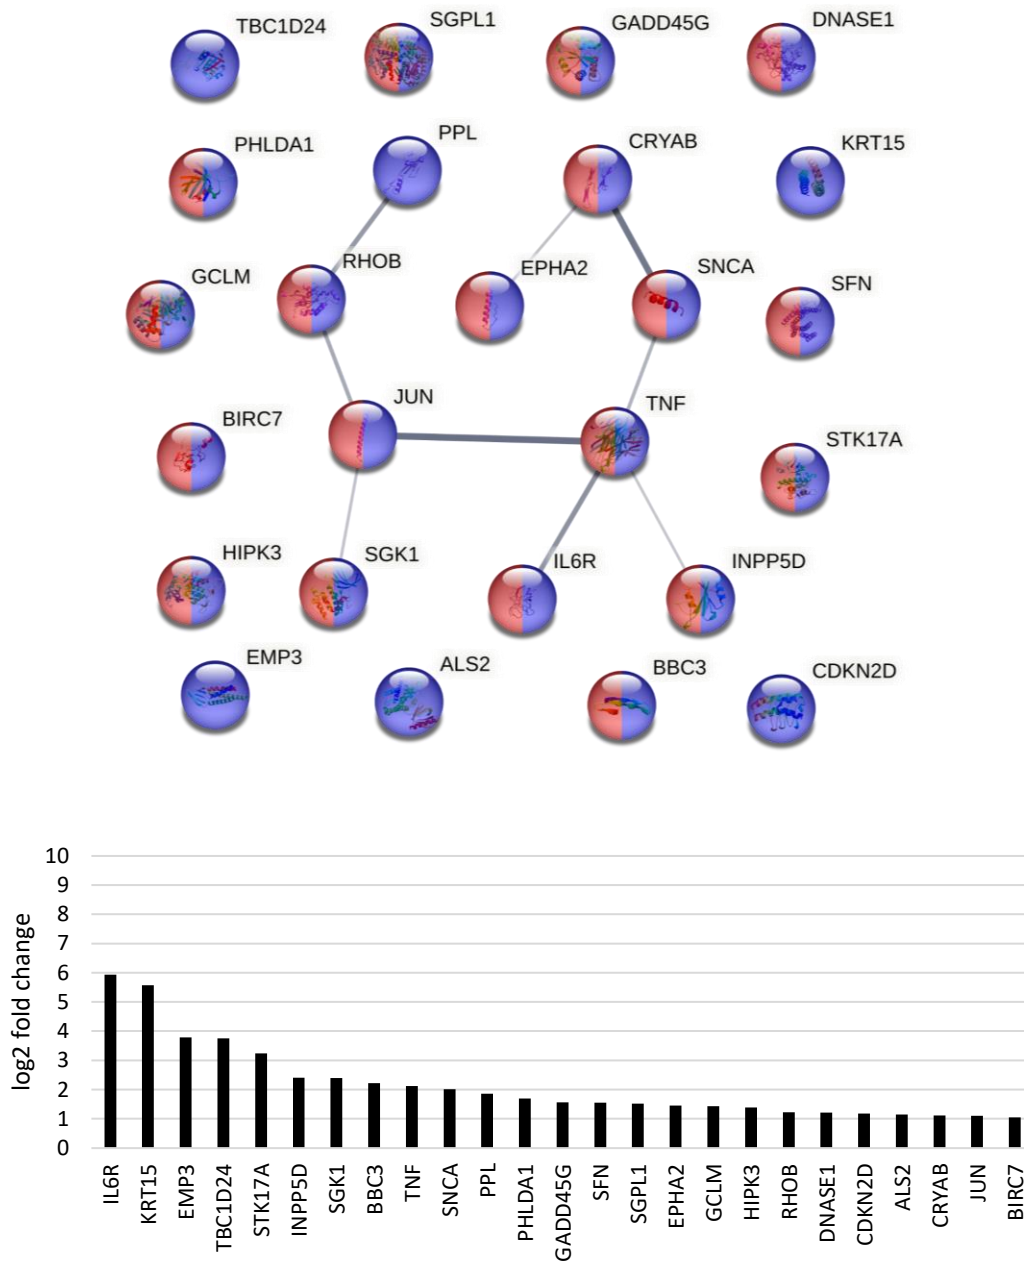

**Supplementary Figure S7:** Complete STRING network of connected and non-connected differentially upregulated genes associated with GO terms apoptosis and cell death. Additionally, log<sub>2</sub> fold changes are depicted. Transcriptome analysis of JAR cells after 2 days of (D) MLN4924 (1  $\mu$ M), (E) cisplatin (4  $\mu$ M) or (F) MLN4924/cisplatin combination (1  $\mu$ M/4  $\mu$ M) treatment. Data represent independent biological replicate mean. For all samples  $n = 3$ .

E

## JAR cisplatin

GO:0006915 Apoptotic process

GO:0008219 Cell death

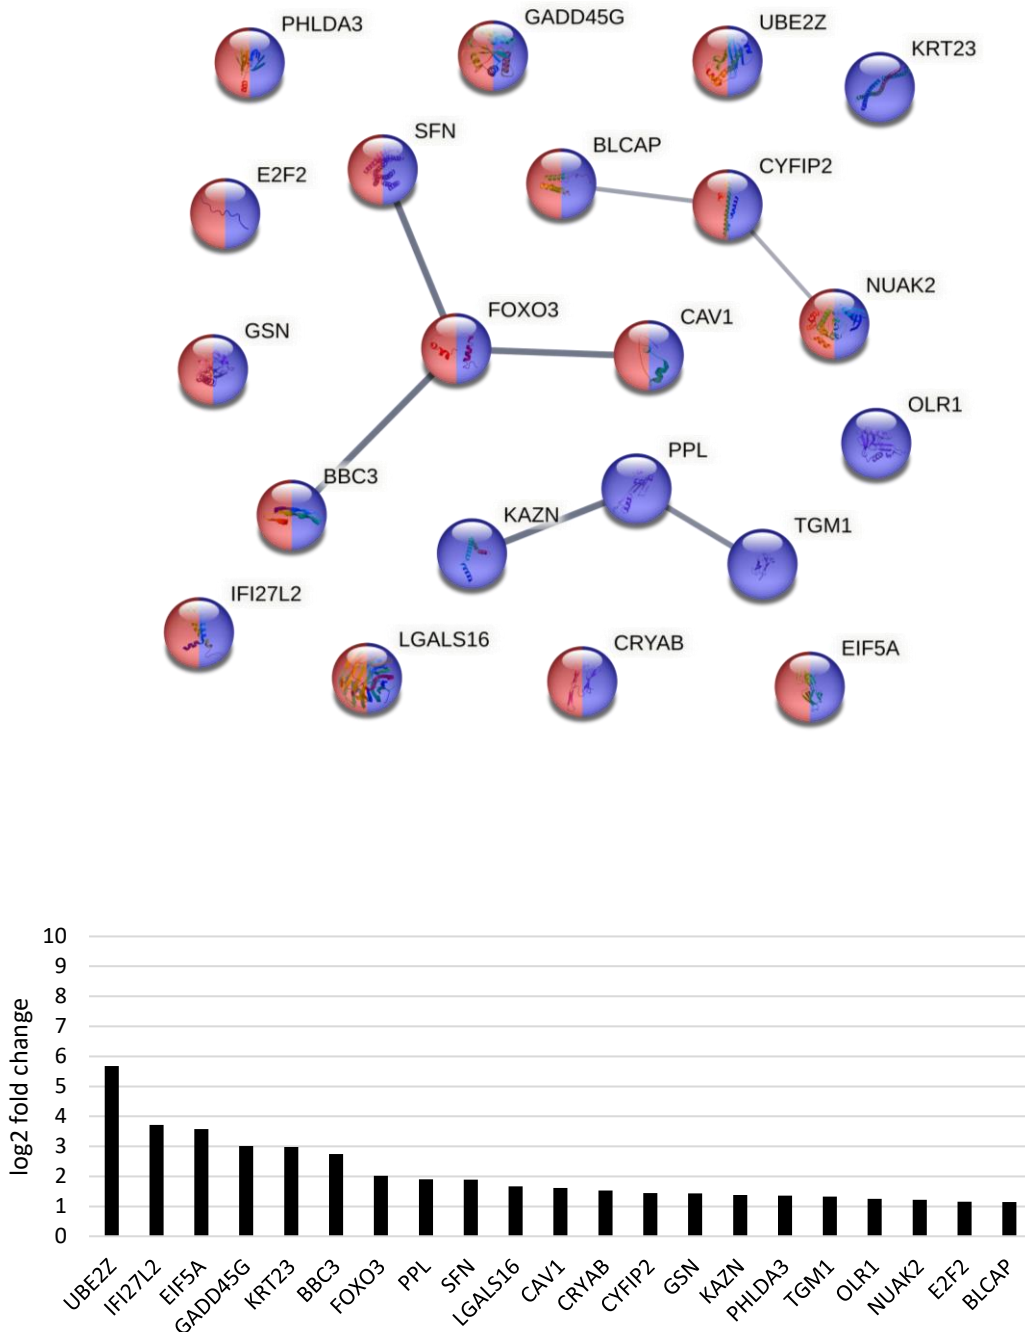

**Supplementary Figure S7:** Complete STRING network of connected and non-connected differentially upregulated genes associated with GO terms apoptosis and cell death. Additionally, log<sub>2</sub> fold changes are depicted. Transcriptome analysis of JAR cells after 2 days of (D) MLN4924 (1  $\mu$ M), (E) cisplatin (4  $\mu$ M) or (F) MLN4924/cisplatin combination (1  $\mu$ M/4  $\mu$ M) treatment. Data represent independent biological replicate mean. For all samples  $n = 3$ .

F

## JAR MLN4924/cisplatin

GO:0006915 Apoptotic process

GO:0008219 Cell death

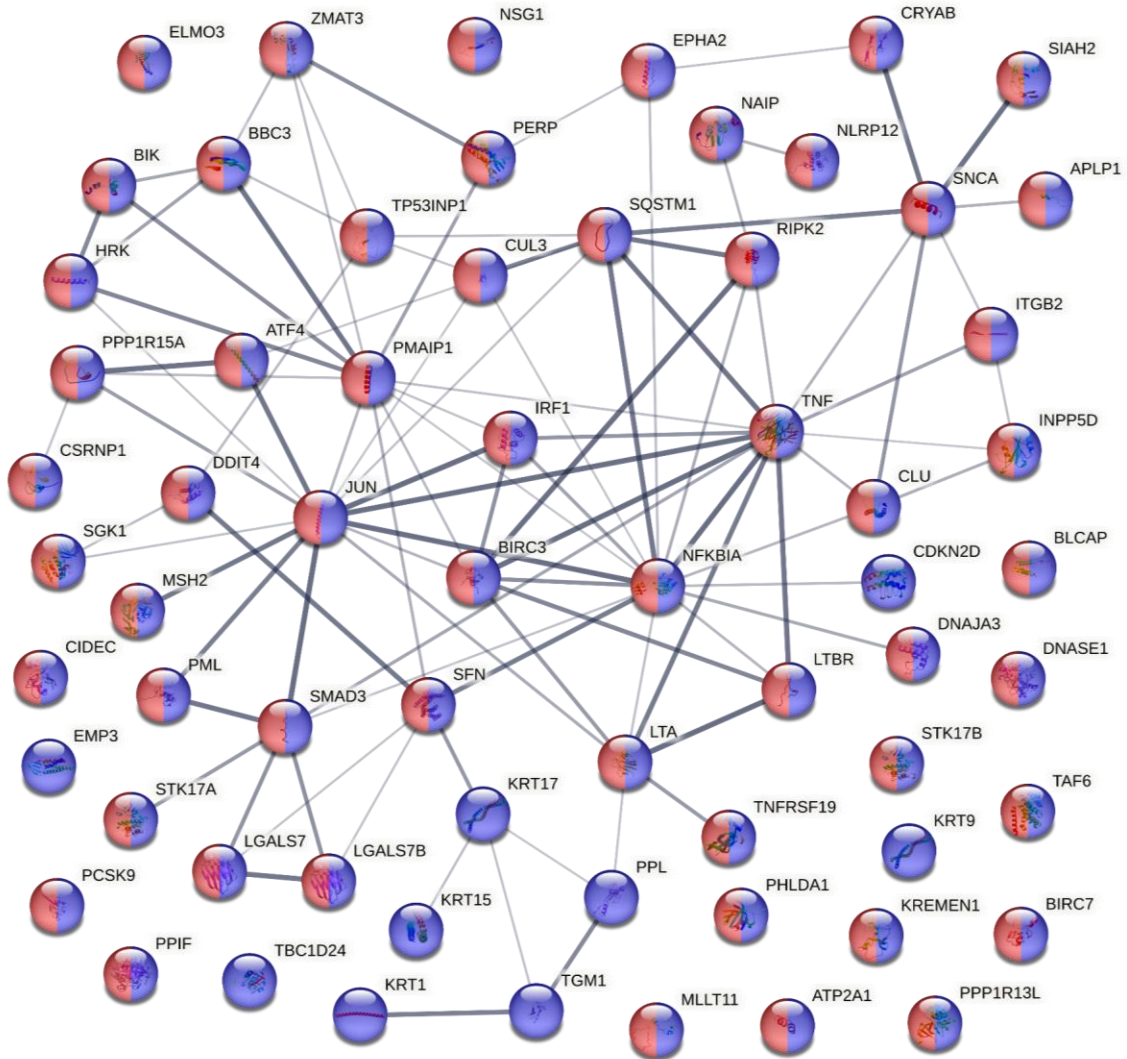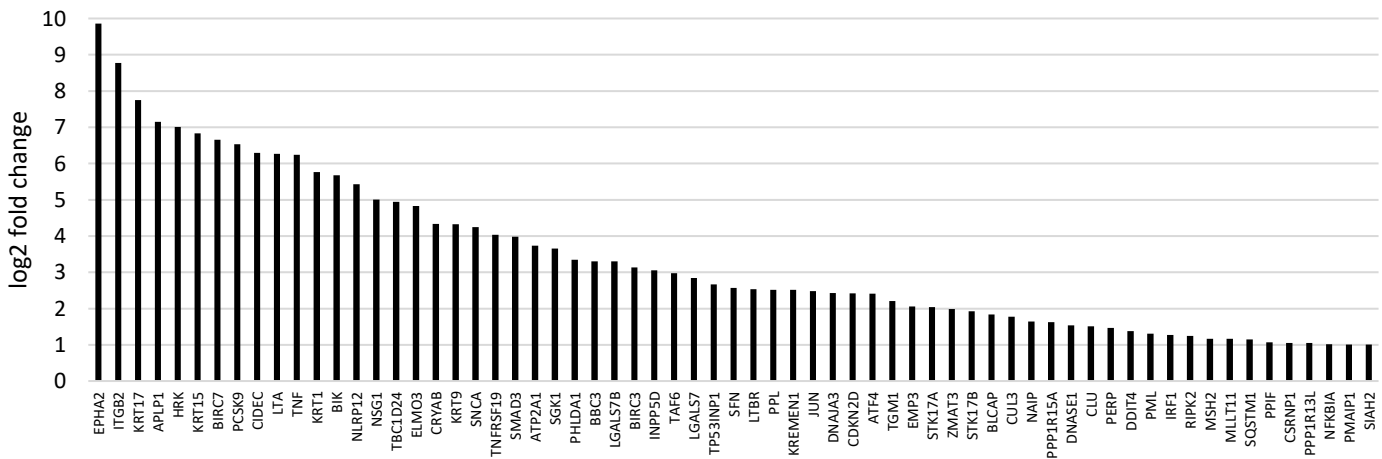

**Supplementary Figure S7:** Complete STRING network of connected and non-connected differentially upregulated genes associated with GO terms apoptosis and cell death. Additionally, log<sub>2</sub> fold changes are depicted. Transcriptome analysis of JAR cells after 2 days of (D) MLN4924 (1  $\mu$ M), (E) cisplatin (4  $\mu$ M) or (F) MLN4924/cisplatin combination (1  $\mu$ M/4  $\mu$ M) treatment. Data represent independent biological replicate mean. For all samples  $n = 3$ .

GO:0006977 DNA damage response, signal transduction by p53 class mediator resulting in cell cycle arrest

GO:2000134 Negative regulation of g1/s transition of mitotic cell cycle

GO:0071156 Regulation of cell cycle arrest

GO:0045786 Negative regulation of cell cycle

GO:0007050 Cell cycle arrest

A

2102EP MLN4924

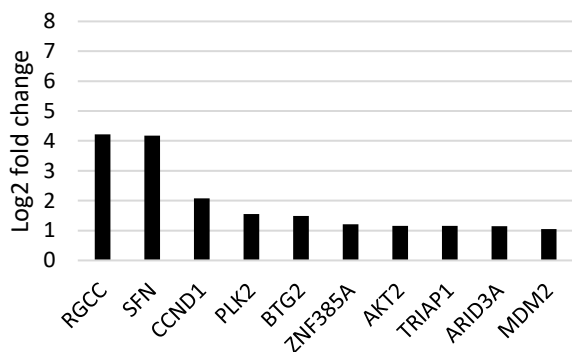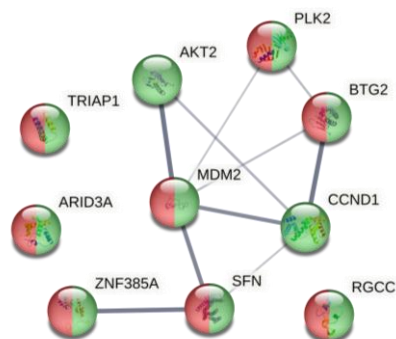

B

2102EP cisplatin

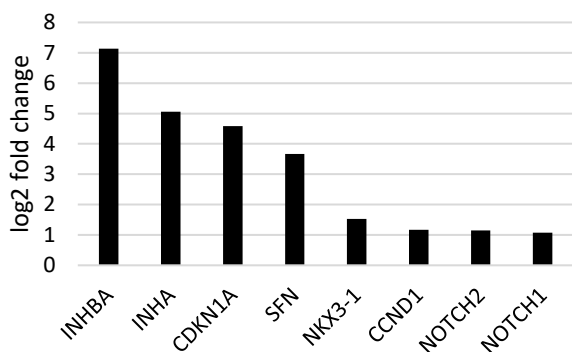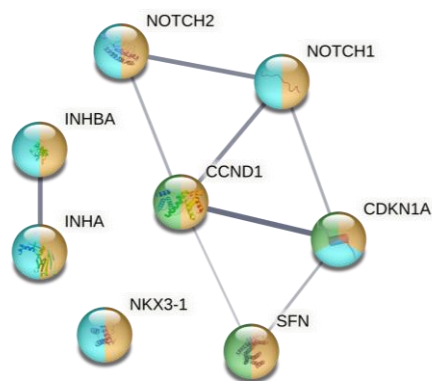

C

2102EP MLN4924/cisplatin

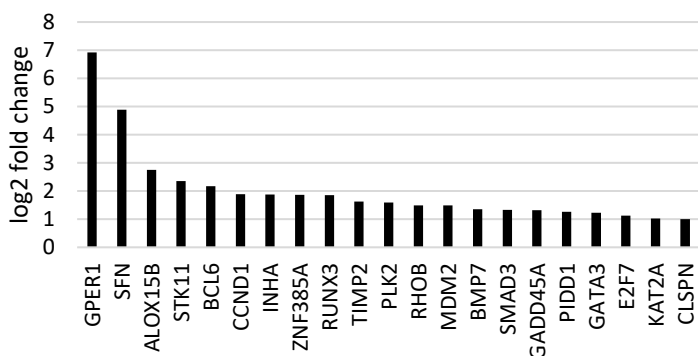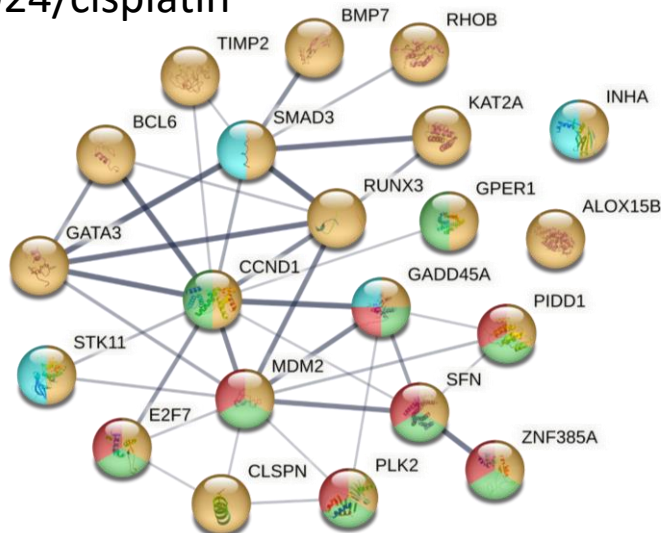

**Supplementary Figure S8:** Transcriptome analysis revealed cell cycle associated GO terms and STRING interaction networks. Log2 fold change of differentially deregulated genes related to the cell cycle is shown. Transcriptome analysis of 2102EP cells after 2 days of (A) MLN4924 (0.25  $\mu$ M), (B) cisplatin (2.5  $\mu$ M) or (C) MLN4924/cisplatin combination (0.25  $\mu$ M/2.5  $\mu$ M) treatment. Data represent independent biological replicate mean. For all samples  $n = 3$ .

HSA-69206 G1/S Transition

HSA-69275 G2/M Transition

GO:0022402 Cell cycle process

GO:0007049 Cell cycle

D

2102EP MLN4924

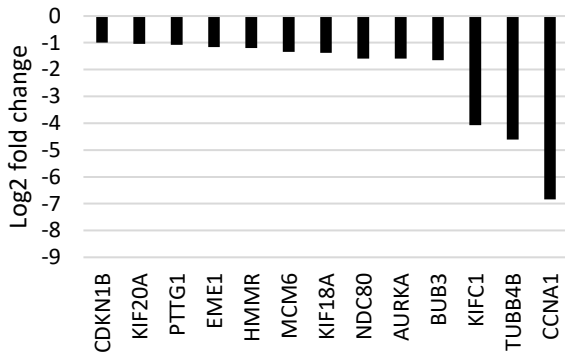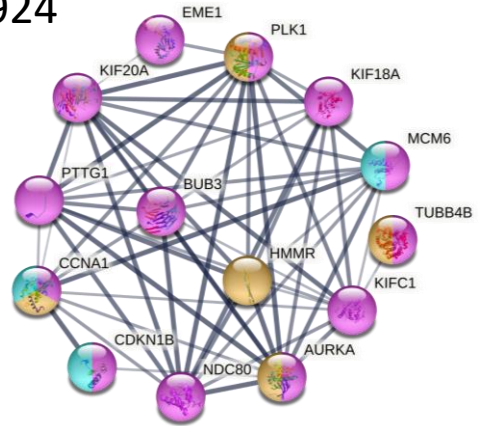

E

2102EP cisplatin

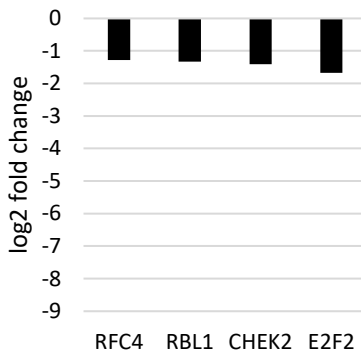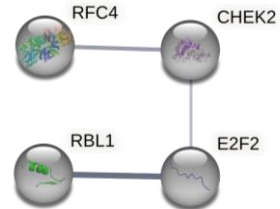

F

2102EP MLN4924/cisplatin

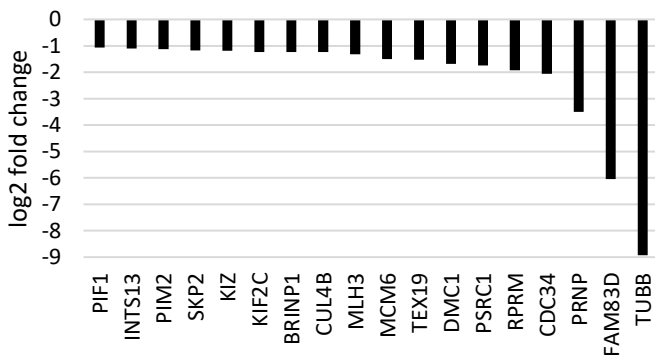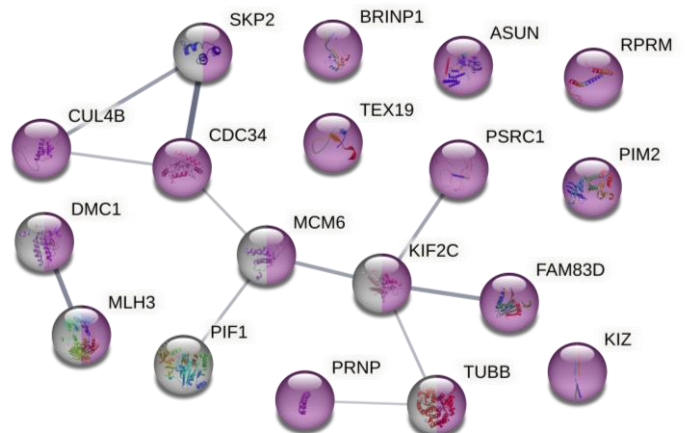

**Supplementary Figure S8:** Transcriptome analysis revealed cell cycle associated GO terms and STRING interaction networks. Log2 fold change of differentially deregulated genes related to the cell cycle is shown. Transcriptome analysis of 2102EP cells after 2 days of (D) MLN4924 (0.25  $\mu$ M), (E) cisplatin (2.5  $\mu$ M) or (F) MLN4924/cisplatin combination (0.25  $\mu$ M/2.5  $\mu$ M) treatment. Data represent independent biological replicate mean. For all samples  $n = 3$ .

GO:0006977 DNA damage response, signal transduction by p53 class mediator resulting in cell cycle arrest

GO:1901988 Negative regulation of cell cycle phase transition

GO:0071156 Regulation of cell cycle arrest

GO:2000134 Negative regulation of g1/s transition of mitotic cell cycle

A

JAR MLN4924

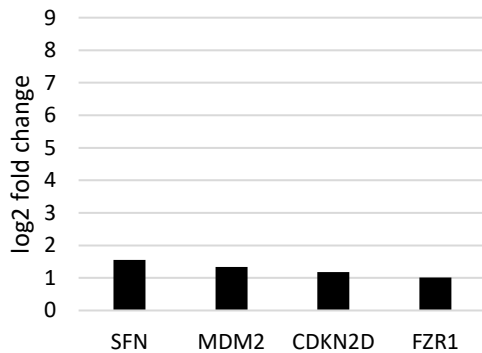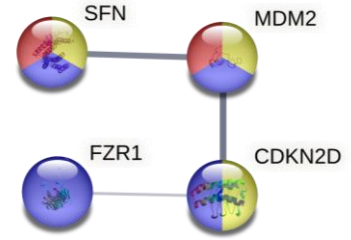

B

JAR cisplatin

No cell cycle related interaction network.

C

JAR MLN4924/cisplatin

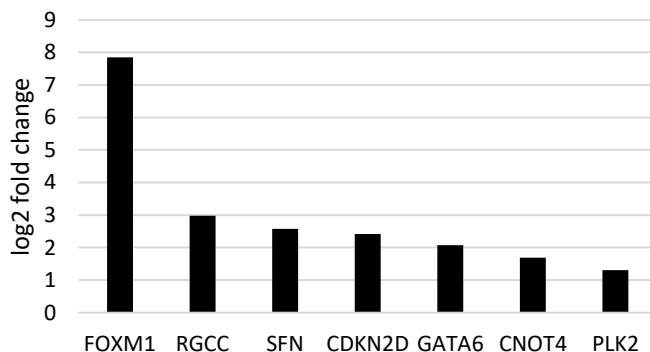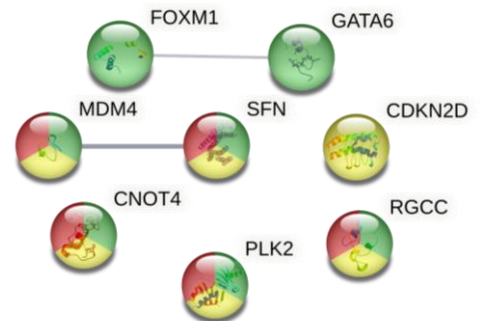

**Supplementary Figure S9:** Transcriptome analysis revealed cell cycle associated GO terms and STRING interaction networks. Log<sub>2</sub> fold change of differentially deregulated genes related to the cell cycle is shown. Transcriptome analysis of JAR cells after 2 days of (A) MLN4924 (1  $\mu$ M), (B) cisplatin (4  $\mu$ M) or (C) MLN4924/cisplatin combination (1  $\mu$ M/4  $\mu$ M) treatment. Data represent independent biological replicate mean. For all samples  $n = 3$ .



GO:0022402 Cell cycle process

GO:0007049 Cell cycle

D

JAR MLN4924

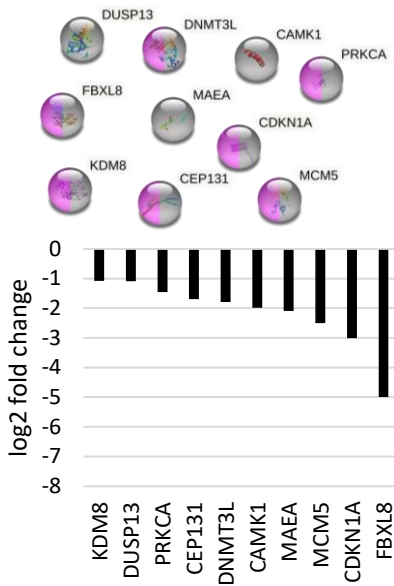

E

JAR cisplatin

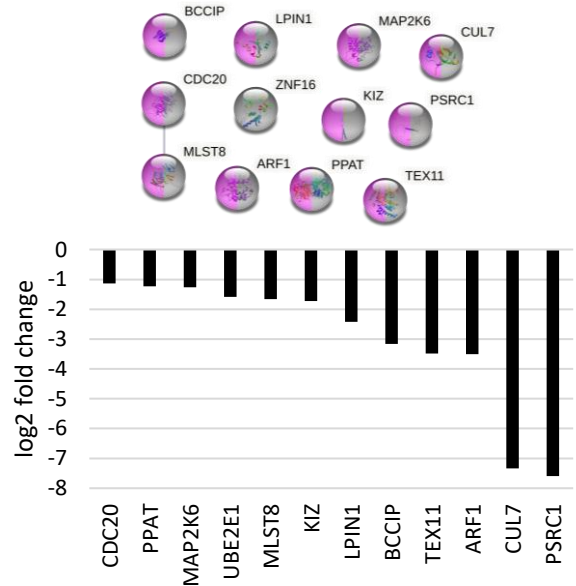

F

JAR MLN4924/cisplatin

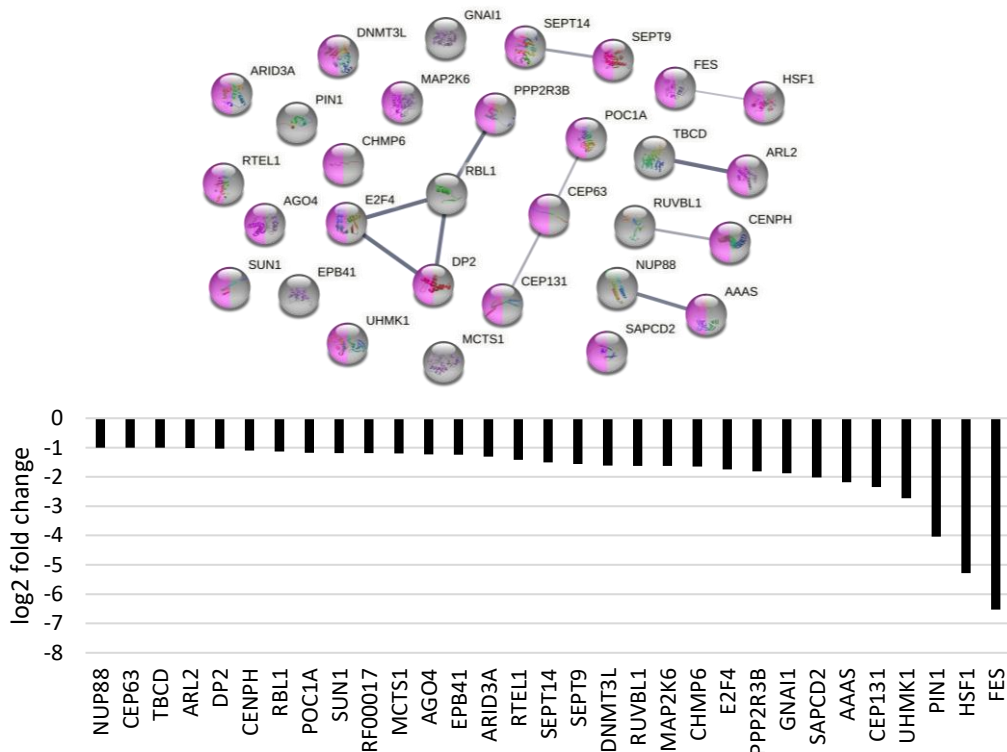

**Supplementary Figure S9:** Transcriptome analysis revealed cell cycle associated GO terms and STRING interaction networks. Log2 fold change of differentially deregulated genes related to the cell cycle is shown. Transcriptome analysis of JAR cells after 2 days of (D) MLN4924 (1  $\mu$ M), (E) cisplatin (4  $\mu$ M) or (F) MLN4924/cisplatin combination (1  $\mu$ M/4  $\mu$ M) treatment. Data represent independent biological replicate mean. For all samples  $n = 3$ .

A

2102EP MLN4924

GO:0030154 Cell differentiation

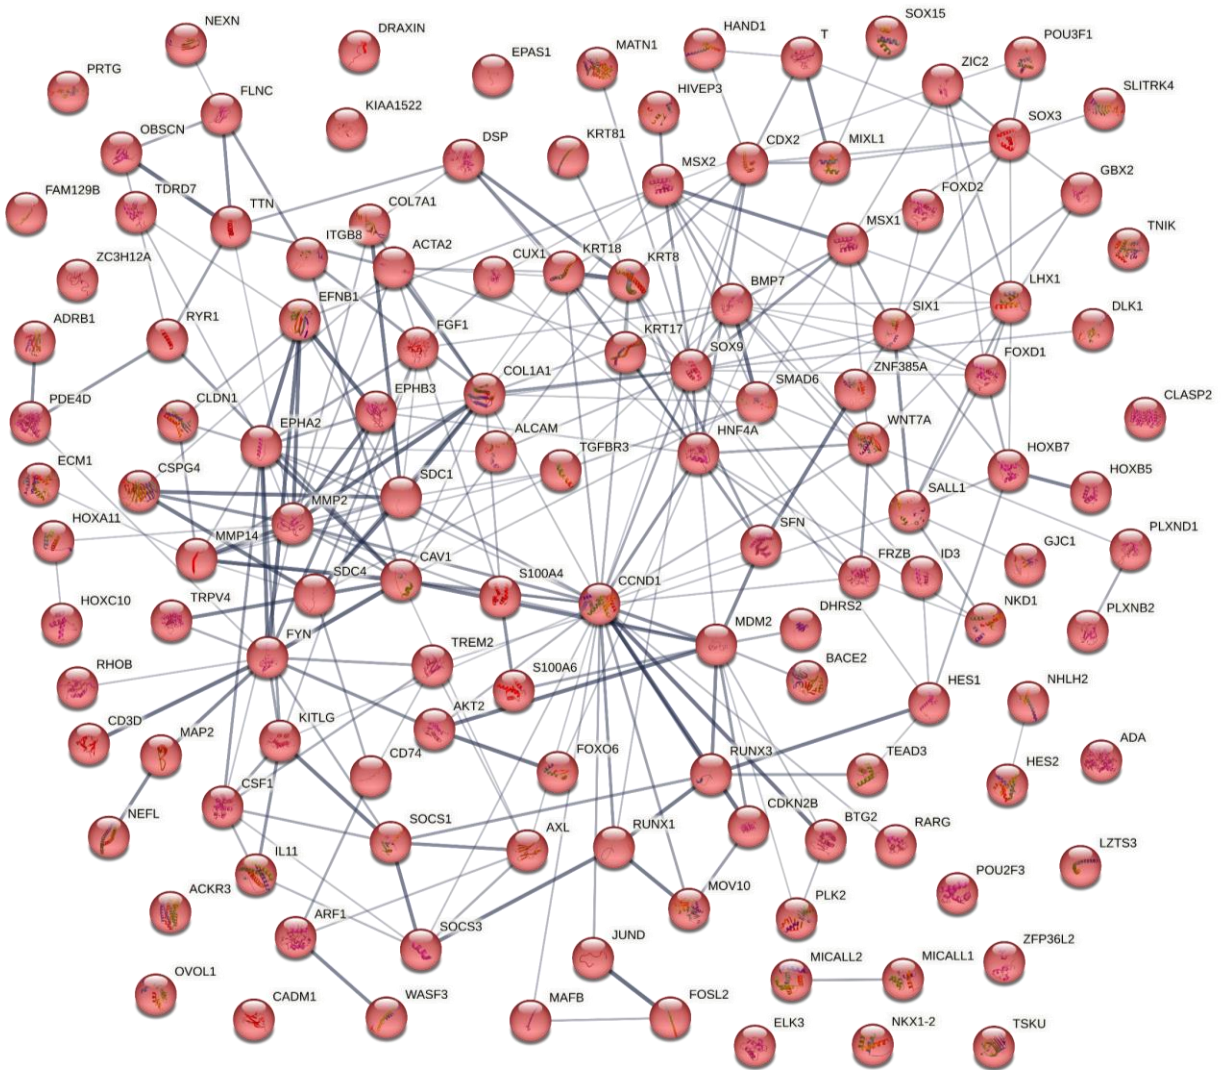

**Supplementary Figure S10:** Complete STRING network with all connected and unconnected protein interactions associated with GO term cell differentiation. Transcriptome analysis was performed on 2102EP cells after 2 days of (A) MLN4924 (0.25  $\mu$ M), (B) cisplatin (2.5  $\mu$ M) or (C) MLN4924/cisplatin combination (0.25  $\mu$ M/2.5  $\mu$ M) treatment. For all samples  $n = 3$ .

B

## 2102EP cisplatin

GO:0030154 Cell differentiation

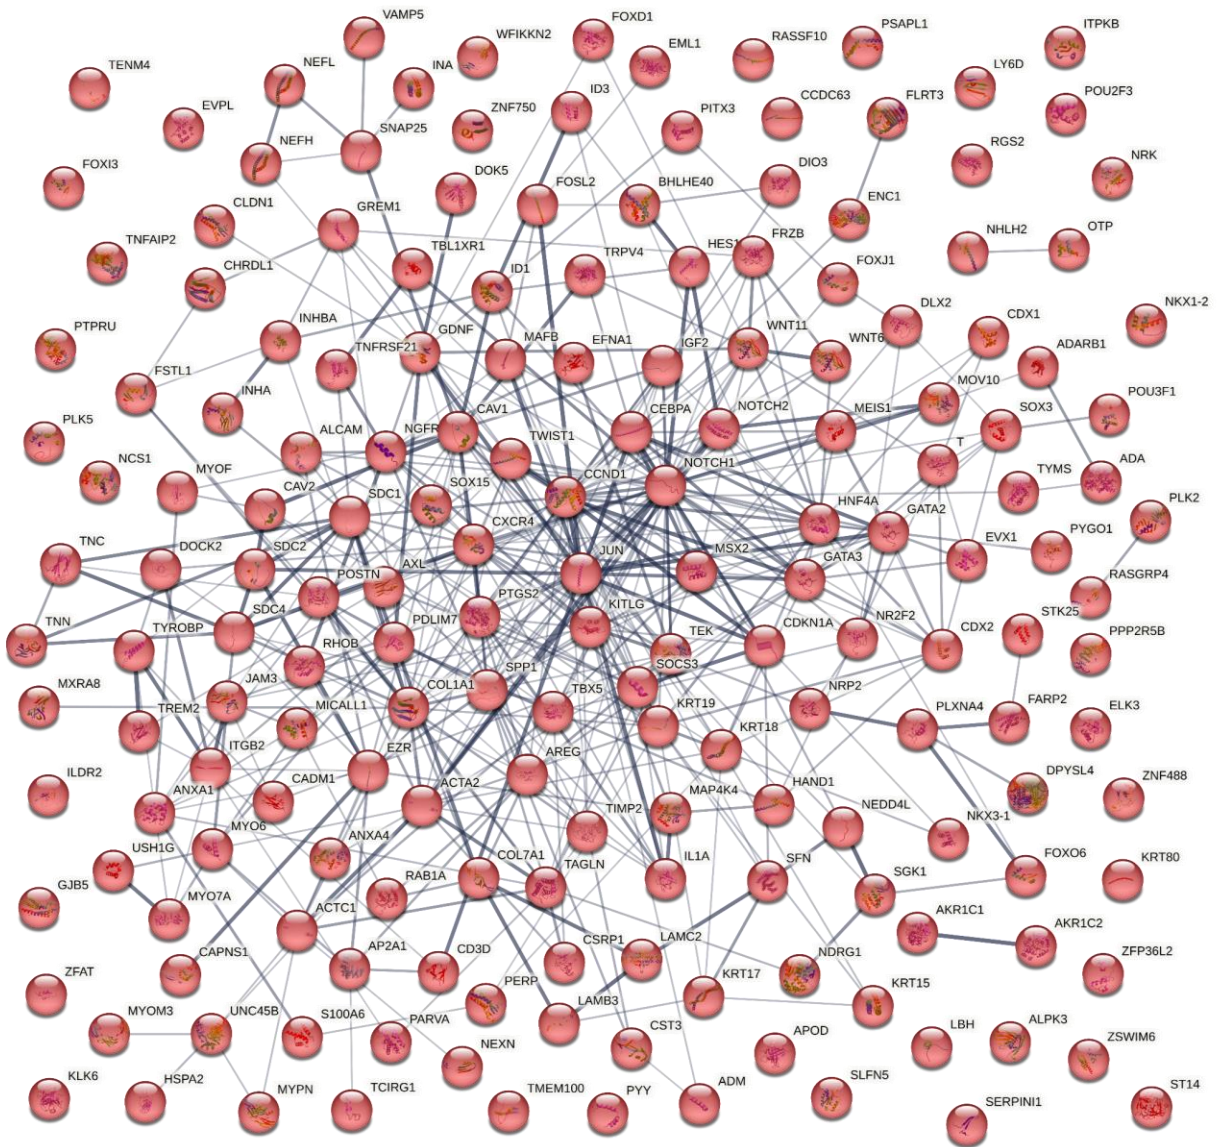

**Supplementary Figure S10:** Complete STRING network with all connected and unconnected protein interactions associated with GO term cell differentiation. Transcriptome analysis was performed on 2102EP cells after 2 days of (A) MLN4924 (0.25  $\mu$ M), (B) cisplatin (2.5  $\mu$ M) or (C) MLN4924/cisplatin combination (0.25  $\mu$ M/2.5  $\mu$ M) treatment. For all samples  $n = 3$ .

C

## 2102EP MLN4924/cisplatin

GO:0030154 Cell differentiation

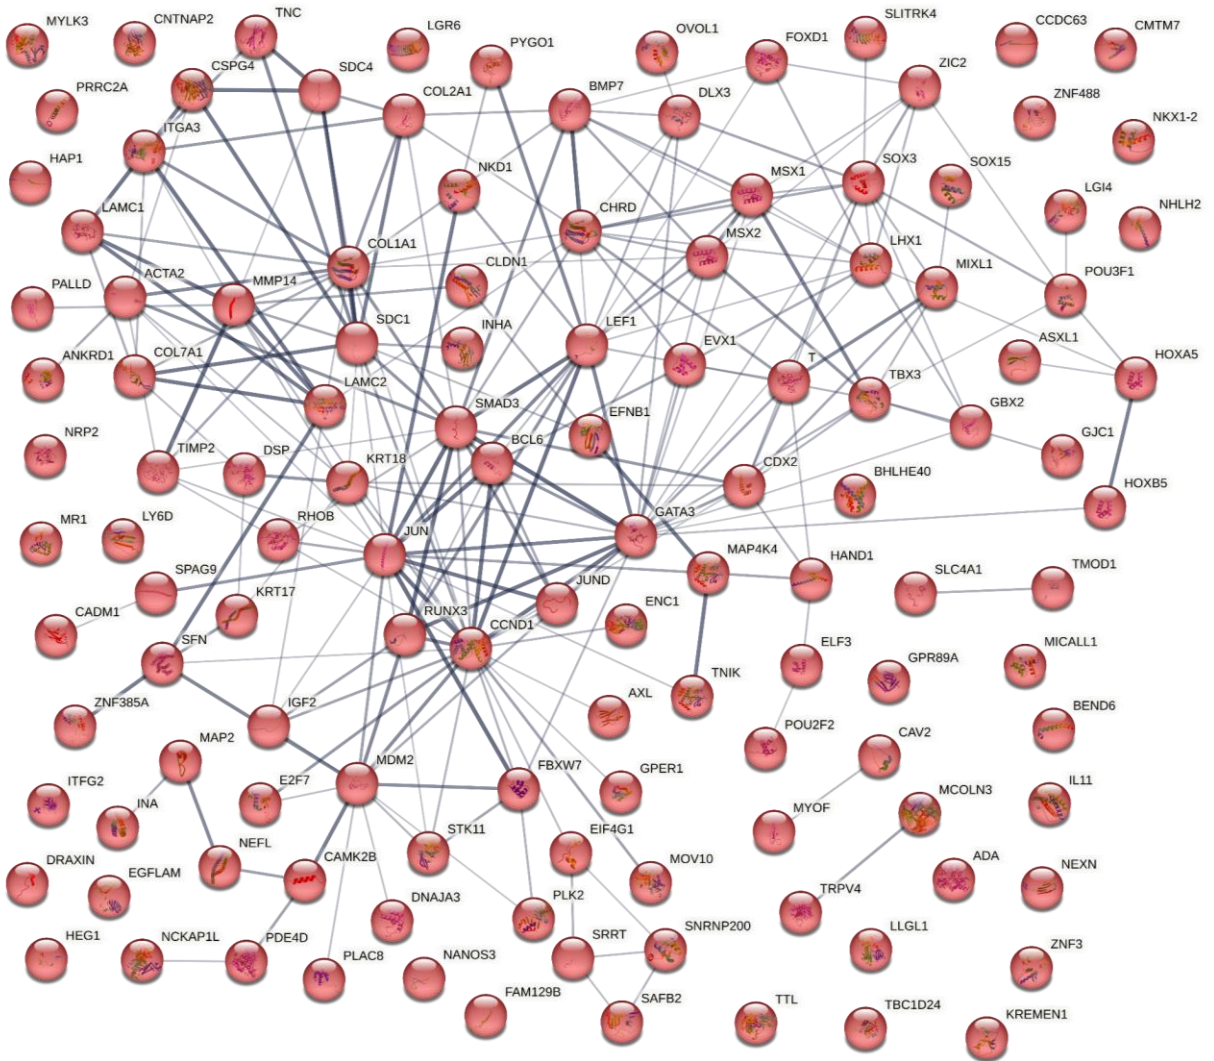

**Supplementary Figure S10:** Complete STRING network with all connected and unconnected protein interactions associated with GO term cell differentiation. Transcriptome analysis was performed on 2102EP cells after 2 days of (A) MLN4924 (0.25  $\mu$ M), (B) cisplatin (2.5  $\mu$ M) or (C) MLN4924/cisplatin combination (0.25  $\mu$ M/2.5  $\mu$ M) treatment. For all samples  $n = 3$ .

D

## JAR MLN4924

GO:0030154 Cell differentiation

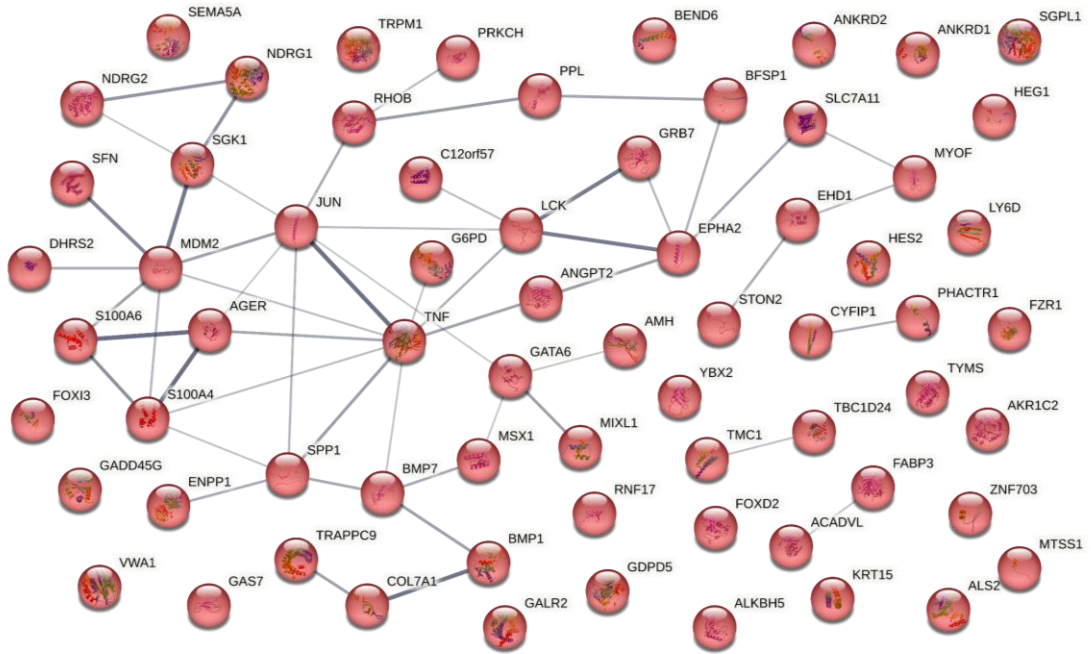

E

## JAR cisplatin

GO:0030154 Cell differentiation

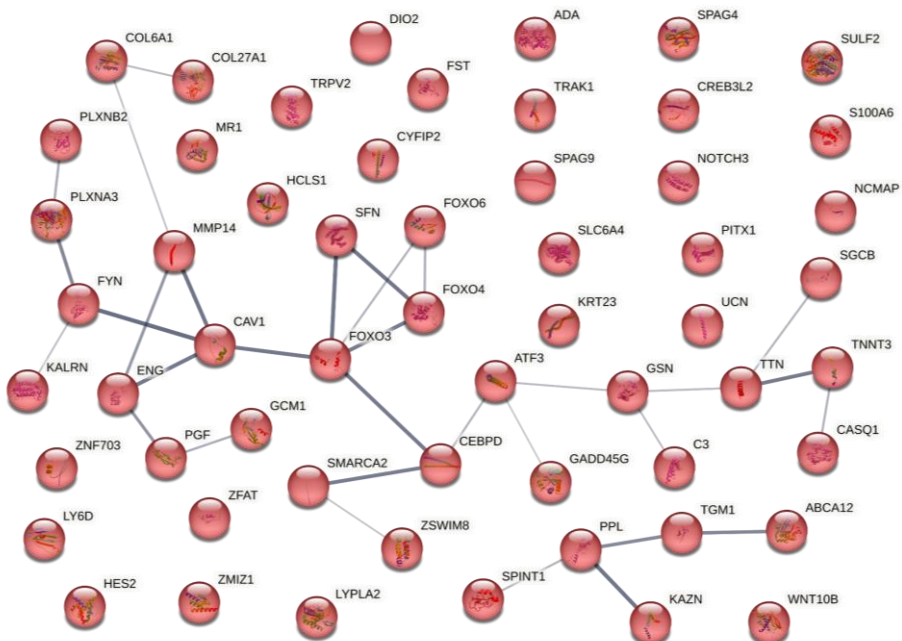

**Supplementary Figure S10:** Complete STRING network with all connected and unconnected protein interactions associated with GO term cell differentiation. Transcriptome analysis was performed on JAR cells after 2 days of (D) MLN4924 (1  $\mu$ M), (E) cisplatin (4  $\mu$ M) or (F) MLN4924/cisplatin combination (1  $\mu$ M/4  $\mu$ M) treatment. For all samples  $n = 3$ .

F

## JAR MLN4924/cisplatin

GO:0030154 Cell differentiation

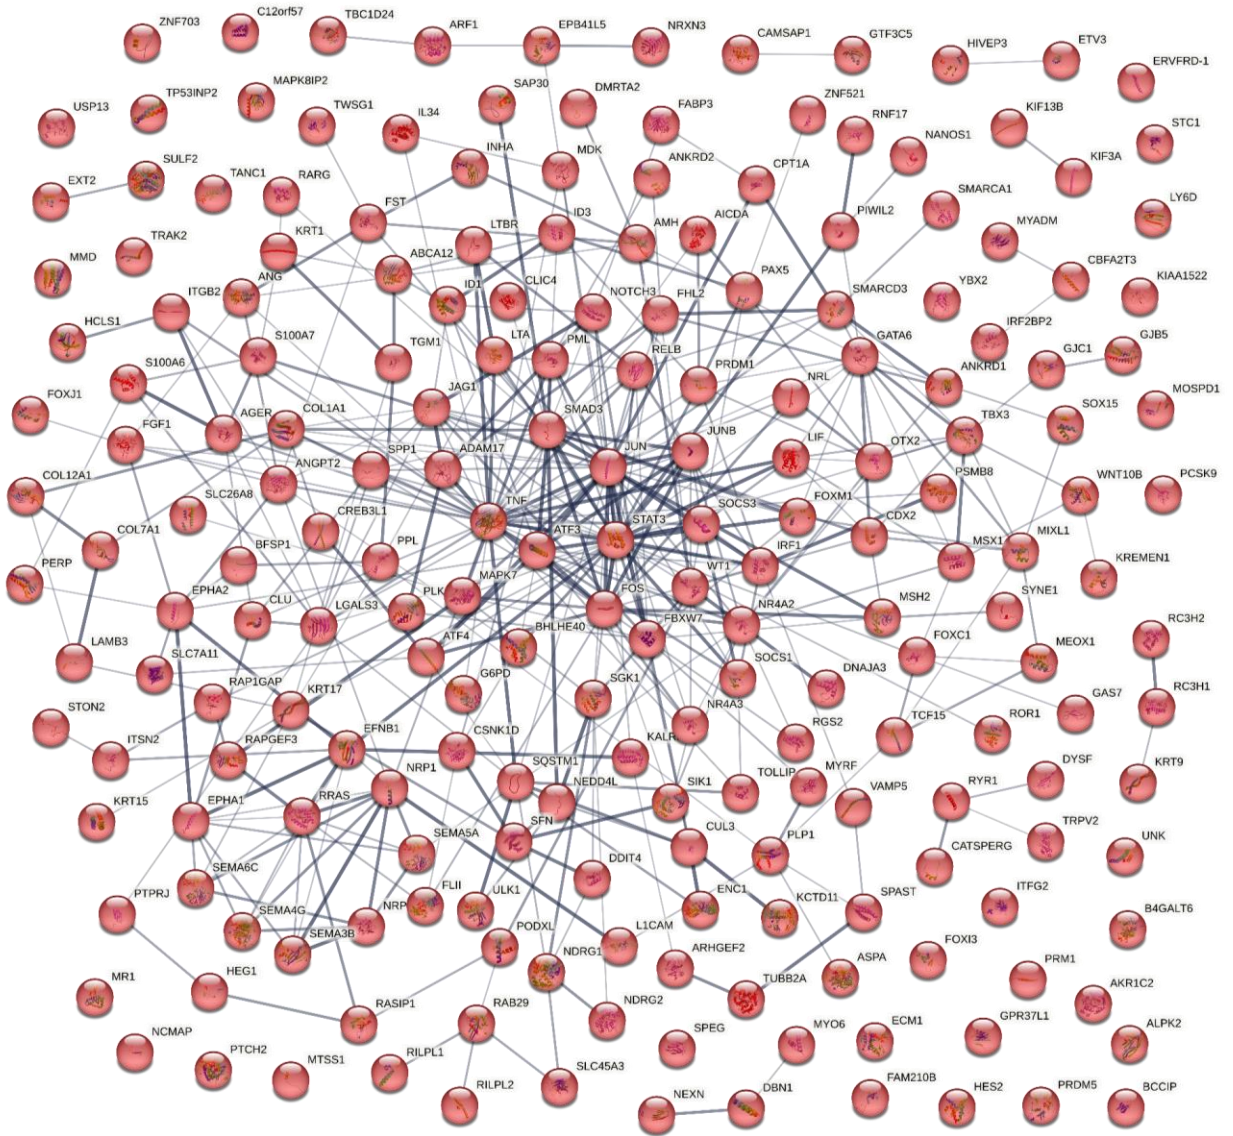

**Supplementary Figure S10:** Complete STRING network with all connected and unconnected protein interactions associated with GO term cell differentiation. Transcriptome analysis was performed on JAR cells after 2 days of (D) MLN4924 (1  $\mu\text{M}$ ), (E) cisplatin (4  $\mu\text{M}$ ) or (F) MLN4924/cisplatin combination (1  $\mu\text{M}$ /4  $\mu\text{M}$ ) treatment. For all samples  $n = 3$ .

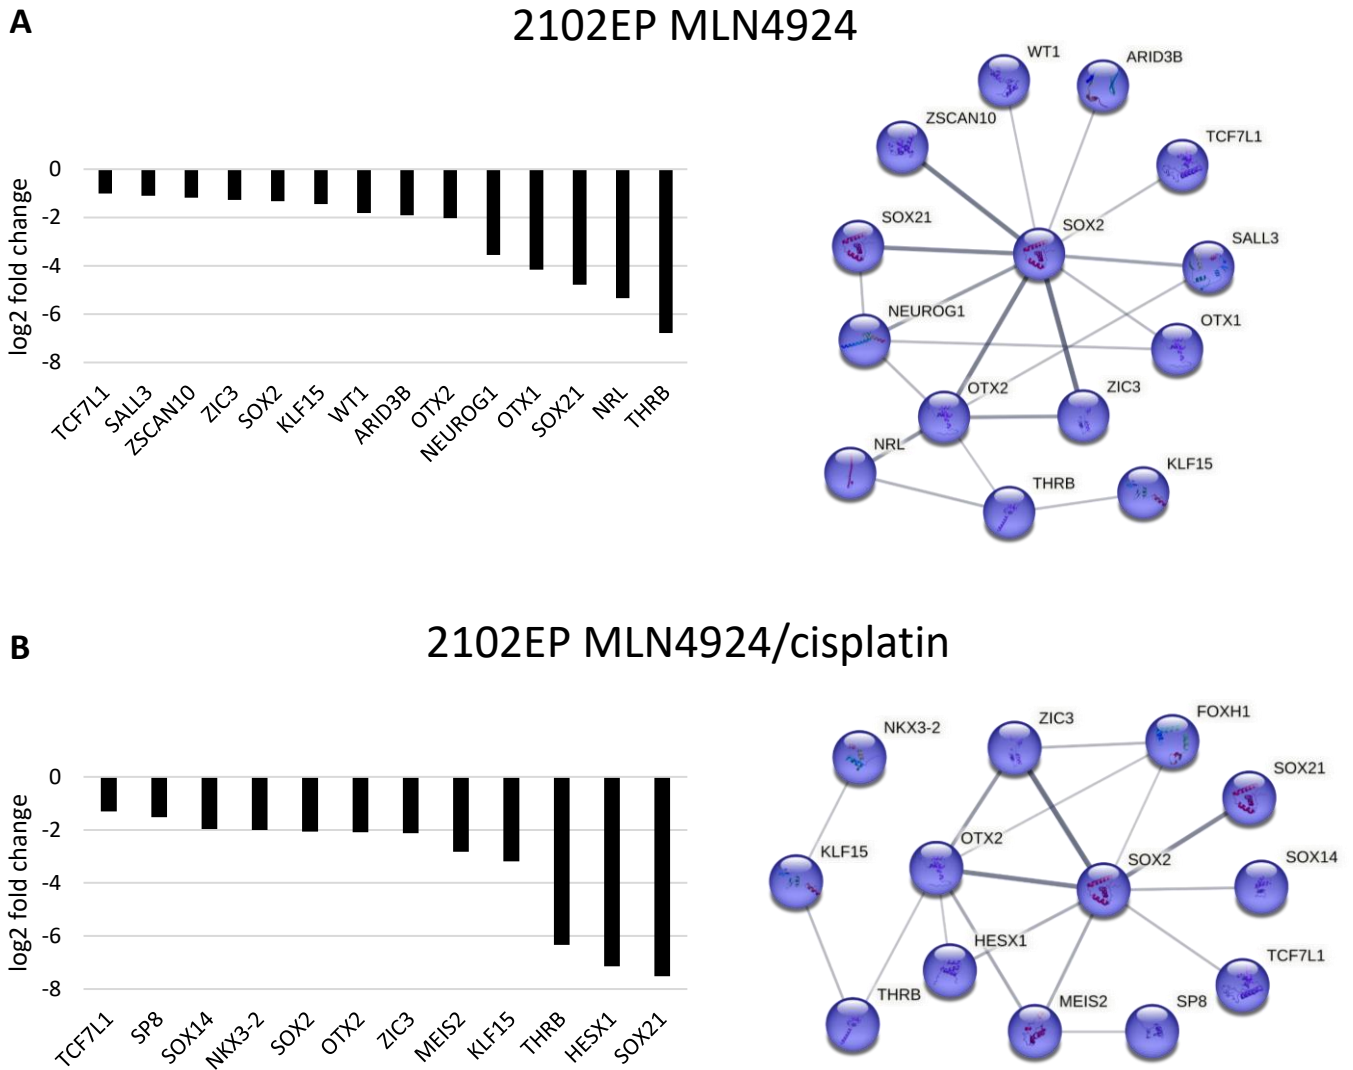

**Supplementary Figure S11:** Transcriptome analysis after MLN4924 only and MLN4924/cisplatin combination treatment revealed downregulation of transcription factors in 2102EP and JAR cells. Analysis was performed 2 days after treatment of (A) 2102EP MLN4924 (0.25  $\mu$ M), (B) 2102EP MLN4924/cisplatin (0.25  $\mu$ M/2.5  $\mu$ M), (C) JAR MLN4924 (1  $\mu$ M) and (D) JAR MLN4924/cisplatin (1  $\mu$ M/4  $\mu$ M). Data represent independent biological replicate mean. For all samples  $n = 3$ .

C

JAR MLN4924

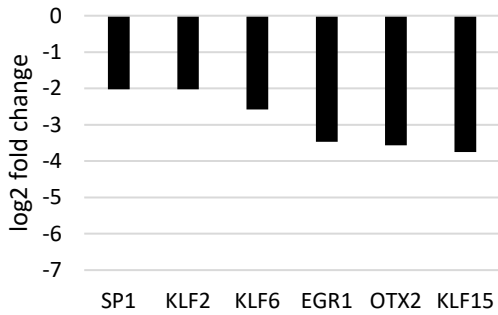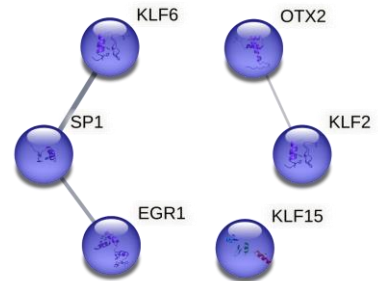

D

JAR MLN4924/cisplatin

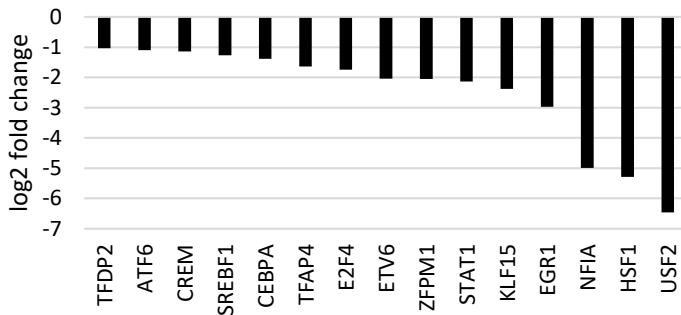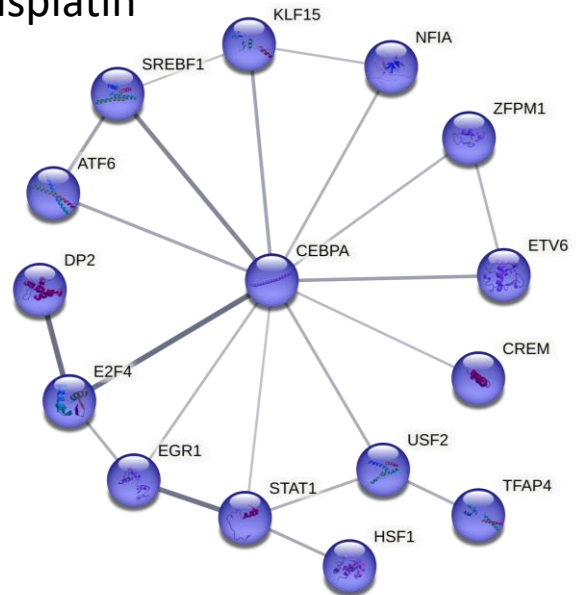

**Supplementary Figure S11:** Transcriptome analysis after MLN4924 only and MLN4924/cisplatin combination treatment revealed downregulation of transcription factors in 2102EP and JAR cells. Analysis was performed 2 days after treatment of (A) 2102EP MLN4924 (0.25  $\mu$ M), (B) 2102EP MLN4924/cisplatin (0.25  $\mu$ M/2.5  $\mu$ M), (C) JAR MLN4924 (1  $\mu$ M) and (D) JAR MLN4924/cisplatin (1  $\mu$ M/4  $\mu$ M). Data represent independent biological replicate mean. For all samples  $n = 3$ .
